# Supplementary material for: Chinese Scholarship on Concurrent Analyses of Indonesia and Timor-Leste: Patterns, Themes, and Positioning
Source: Preprints.org preprint supplement (doi:10.20944/preprints202406.1036.v1), 2024-06-17
Supplement: Supplementary file 1 [file supplementary]

**S1 Mata Information of Sample Articles**

| Title  题名 | Author  作者 | Journal期刊 | Keyword-关键词 | Summary-摘要 | Year-年 | Volume-卷 | Period-期 | PageCount-页码 |
| --- | --- | --- | --- | --- | --- | --- | --- | --- |
| 基于GDELT事件数据的东南亚国家地缘政治风险测度与分析 | 杜树坤;张晶;韩志军;王琳洁;唐代红; | 世界地理研究 | 地缘政治;;地缘政治风险;;风险测度;;GDELT;;东南亚 | 随着我国“走出去”战略和“一带一路”倡议的持续推进，对海外地缘政治风险研究的需求也与日俱增。东南亚地区是“一带一路”建设重点地区，地缘环境十分复杂，地缘政治事件频发。通过事件分析刻画东南亚国家地缘政治风险的等级，并分析其时空特征有重要的理论和实践意义。本研究发现：(1)东南亚地缘政治风险总体稳定可控，但内部时空差异较大。菲律宾和缅甸的地缘风险水平相对较高，老挝、新加坡、东帝汶和越南较低，其他国家则处于波动状态。(2)印尼、柬、泰、马等四国地缘政治风险受内部事件影响高于其他五国，国家内部问题亟待解决；文莱、老挝、东帝汶、越南和新加坡等五国地缘政治风险受外部事件影响较高，内部环境相对较为稳定。(3)东南亚国家地缘政治风险受外部事件影响远高于内部事件影响，其中外部事件主要来自美国、中国和澳大利亚等域外国家，域内国家占比较低，主要来自泰国和马来西亚。研究结果为掌握东南亚地缘政治风险情况与保障“一带一路”建设提供科学支撑。 | 2024 | 33 | 04 | 13-23 |
| 冷战时期印尼在世界卫生组织的活动分析：基于卫生外交视角 | 吴耀庭; | 太平洋学报 | 世界卫生组织;;印尼;;传染病;;卫生外交;;国家利益 | 冷战时期，印尼在世界卫生组织的活动是其卫生外交的重要组成部分，但相关研究却不多。本文通过分析已解密的历史档案发现，冷战时期印尼为了遏制传染病的流行，通过卫生外交积极地与世界卫生组织进行国际合作，以缓解其天花、疟疾等卫生治理的压力。同时，印尼在世界卫生大会等国际舞台上的外交活动，成为其维护国家利益，提升发展中国家地位和影响力的重要手段。通过对冷战时期印尼在世界卫生组织活动的深入探讨，既可分析冷战时期印尼对外政策的又一面向，又能更好地理解当代印尼卫生外交中的历史传承，以窥探其政策取向。 | 2023 | 31 | 12 | 58-70 |
| 从东帝汶危机看美国霸权 | 高艳杰; | 历史研究 | 东帝汶;;印尼;;美国;;东南亚;;冷战 | 1975年12月，印度尼西亚苏哈托政府以受邀协助平叛为由全面入侵东帝汶，并在次年将其并入版图。由于利益攸关的东盟国家和澳大利亚都倾向于东帝汶并入印尼，美国的立场成为苏哈托政府最大顾虑和关键影响因素。从20世纪70年代东南亚地缘政治看，美国政府在实施海外战略收缩后，急需印尼在东南亚扮演区域秩序主导者角色，此种角色是其亚太盟友和东南亚本土同盟无法替代的。美国政府在东南亚区域秩序上对印尼的过度依赖，导致其对苏哈托政府侵略行径的纵容达到极致。苏哈托政府吞并东帝汶最终成为冷战后期被“默许”的公然侵略，而福特政府的应对政策折射出该时期美国在东南亚影响力的严重衰退以及美国霸权的实质。 | 2023 |  | 05 | 143-165+222-223 |
| “一带一路”在东南亚的十年共建与高质量发展的方向 | 杨悦;李正阳; | 国际论坛 | “一带一路”倡议;;中国—东盟命运共同体;;周边外交;;中国东盟关系 | “一带一路”倡议提出十年来，中国与东南亚国家秉持共商共建共享原则，通过高层引领推动、签署合作框架、推动项目实施、完善政策措施、发挥平台作用，取得了丰硕的共建成果。东南亚地区的“五通指数”一直在所有“一带一路”沿线地区中名列前茅，示范引领作用突出，双方发展战略对接日益紧密，互联互通水平提升显著，经贸关系跨越式发展，新领域合作快速推进，人文交往渠道持续拓宽，为高质量共建“一带一路”提供了合作典范。东南亚国家均支持“一带一路”倡议，既有双方战略理念高度契合的原因，也是东南亚国家精英维护以“发展”为基础的政权合法性驱动的必然结果。当然，出于国家需求的不同以及对债务偿还能力、平衡外交、国内结构性治理弱点以及国内政治等因素的考量，东南亚国家对“一带一路”接受程度和形式各不相同。未来，双方可从深化既有共建成果、将各领域倡议落到实处、攻坚重点难点问题等三个方向努力，推动共建“一带一路”高质量发展。 | 2023 | 25 | 06 | 53-71+157 |
| 周边建构与美国盟友的联盟战略——以澳美同盟为例 | 秦升; | 当代亚太 | 周边;;建构主义;;澳英美安全伙伴关系;;澳美同盟;;地缘政治 | 拜登执政以后，美国加大了对联盟体系的更新与建设，由于实力的相对衰落，美国日益依赖联盟体系推动其全球战略，盟友关于联盟的战略定位以及与联盟的互动正在成为影响美国联盟体系发展变化的重要方面。当前，对于美国联盟体系的研究主要集中于联盟管理、联盟困境与联盟转型三个方面，对于盟友的分析也多采用霸权国视角。文章借鉴国际关系理论中的建构主义思想，结合源自中国的“周边”概念，通过对比陆权、海权等地缘政治概念，阐释了国家以我为主建构周边的过程，论证了周边建构在国家对外战略中的突出作用，初步探索了周边的地缘政治内涵。通过引入实力认知、历史记忆、美国介入以及战略时机四个变量，从中观的地区层次分析了美国盟友的周边安全建构对其联盟战略的影响。文章梳理了澳大利亚周边安全建构的历史，运用以周边为核心的理论框架，探讨了在《澳新美同盟条约》以及“澳英美安全伙伴关系”形成过程中澳大利亚联盟战略的演化机制，一定程度上弥补了当前联盟战略研究中观地区层次的缺失，指出美国盟友的联盟战略主要围绕其对周边的安全建构而形成。 | 2023 |  | 02 | 94-122+158-159 |
| 2010年以来的东南亚独立电影：回溯，正发生，近未来 | 王淞可; | 北京电影学院学报 | 东南亚;;独立电影;;幽灵;;电影节;;人类世 | 东南亚独立电影的兴起主要发生在20世纪90年代末至21世纪初，很多知名东南亚独立电影作者至今仍处在创作高峰。因此，讨论如今的东南亚独立电影必然要回溯其诞生之初的传统，关心其正发生的趋势，探索其中的美学变化。本文将以“回溯、正发生、近未来”为思考面向，从地缘、幽灵学（Hauntology）、电影节系统、软科幻与人类世（Anthropocene）等几个角度介绍2010年以来的东南亚独立电影情况。 | 2023 |  | 03 | 111-124 |
| 印太语境下澳大利亚与印度尼西亚的海洋安全合作 | 王玥; | 印度洋经济体研究 | 印太战略;;海洋合作;;地区安全;;印太秩序 | 随着2017年美国“印太战略”的出台，大国在印太地区战略竞争加剧，地缘政治风险上升。澳大利亚和印度尼西亚虽然秉持不同的印太秩序观，但却积极加强海洋安全合作，在海洋安全机制建设、非传统安全合作以及海事能力提升等方面取得诸多进展。未来，随着后疫情时代海洋安全问题的日益严峻，印太同盟体系的调整以及两国“制衡”中国的需要，海洋安全合作仍将是澳印尼两国关系中的重要内容。受制于不同的印太秩序架构、相异的战略文化以及历史上形成的不信任因素，澳大利亚和印尼海洋安全合作仍面临诸多不确定性。 | 2022 |  | 04 | 71-88+158 |
| 东帝汶基础教育治理模式嬗变的历史逻辑 | 常甜;马早明; | 比较教育学报 | 东帝汶;;基础教育治理;;治理模式;;历史逻辑 | 在东帝汶基础教育治理变革中，由于其特殊的被殖民历史背景和建国过程，体现了与其他东南亚国家极不相同的特点。综观东帝汶基础教育治理模式的演进历程，可大致概括为被殖民期与后殖民两个阶段下的四种模式，即葡萄牙殖民时期的“天主教会单一治理”模式、印度尼西亚占领时期的“激进式植入治理”模式、联合国过渡行政当局与东帝汶过渡准内阁联合治理时期的“温和过渡治理”模式，以及东帝汶正式独立以来的“国家本体与多样主体糅合治理”模式。从治理理论中的四大核心要素，即治理的主体、治理的价值导向、治理的手段、治理的成效为分析视角，对东帝汶基础教育在不同阶段下的不同治理样态及演进逻辑进行探讨，以期对我国在基础教育治理过程中所面临的矛盾或热点难题提供些许思考。 | 2022 |  | 04 | 58-73 |
| 帝汶岛史前考古研究概述 | 翟天民;姚富靖; | 南方文物 | 帝汶岛;;史前考古学;;考古学史;;东南亚群岛 | 帝汶岛位于澳大利亚北部,是巽他群岛最东端的岛屿之一。目前国内外对于帝汶岛史前考古史的梳理较少,结合帝汶岛政治势力的进退和考古学家的研究可将其划分为四个阶段,时间跨度从阿尔弗雷德·布勒的早期工作一直延续到最近的考古研究。虽然只选取了帝汶岛这样一个小的地理单元,但是由此可管窥整个东南亚史前考古的情况,对帝汶岛史前考古学史的概述不仅可以给相关学者在帝汶岛下一步的史前考古工作提供借鉴,而且对于东南亚地区史前考古的全面布局具有重要意义。 | 2022 |  | 03 | 155-163 |
| 东南亚九国教育受援发展形态比较分析 | 杨体荣; | 比较教育研究 | 东南亚;;中国;;教育援助 | 东南亚9国(除新加坡和文莱)不同程度地依赖教育援助发展本国教育。运用描述性统计和比较分析法，从规模、结构、来源和方式维度探析东南亚国家教育受援的形态，分析表明，2010—2019年间东南亚9国教育受援在规模上呈现不断上涨的趋势，并在同层次发展援助中占据较大比例；在结构上集中于基础教育和高等教育等领域；在来源上，以老牌发达国家和国际组织为主，但沙特等“自然资源禀赋型”国家和东南亚区域内国家的援助增强；在方式上，以项目干预、奖学金和学生资助为主，较少使用预算支持等形式的援助。中国对东南亚国家进行精准教育援助的策略包括科学分析教育受援国的各项需求，合理制定教育援助规划；准确判断教育受援的结构短板，提供针对性教育援助；把握教育受援的发展动态，选择适宜方式开展援助。 | 2022 | 44 | 06 | 65-74 |
| 自主—依赖困境：澳大利亚的海洋战略调整 | 李途; | 亚太安全与海洋研究 | 澳大利亚;;海洋战略;;自主—依赖困境;;自主防御;;澳美同盟 | 自主—依赖困境，构成了澳大利亚海洋发展战略的核心特征。一方面，对地区安全威胁的认知，决定了澳大利亚需要采取与强国结盟的方式来维护自身安全；另一方面，对同盟承诺限度的认识，则决定了澳大利亚必须发展独立自主的国防能力。澳大利亚在“自主防御”与依赖盟国之间的调整、转化与挣扎，不仅贯穿了澳大利亚海洋战略发展的始终，也体现了澳对地区安全环境及澳美同盟关系的认识。从“自主防御”的提出、发展到“回归”,澳美同盟与“自主防御”的关系也经历了相互冲突、相互借重，再到相互补充的过程。历经半个世纪的发展，澳大利亚的“自主防御”政策最终回归与强国结盟的传统，通过加强与美国的合作来实现自身安全，但其内在的矛盾和悖论无法避免。 | 2022 |  | 03 | 105-124+4 |
| 印尼现代国家的建构——以央地关系、族群、宗教三位一体关系为视角的考察 | 高鹏; | 社会科学 | 印尼;;国家建构;;央地关系;;族群;;宗教 | 印尼历史就是现代国家建构史。首先,中央对地方从压制到分权,导致权力的此消彼长,但却在相当程度上消弭了地方分离倾向,保证了国家统一;其次,由区分"我者"和"他者"族群到承认族群平等的多元统一,虽然一些原始部族和华人仍受隐性歧视,但却保证了国家认同;再次,前期对伊斯兰教国运动和政治伊斯兰的压制,逐步演变为宗教激进势力在经济社会生活中的合法化,但印尼整体上保持了世俗化方向与温和穆斯林在社会中占据主导地位,保证了现代国家形态。对央地关系、族群与宗教三位一体关系的调适,也展现出印尼建构现代国家的政策弹性与韧性。 | 2022 |  | 02 | 50-59 |
| 例外状态下的国家权力:新冠疫情对东南亚国家治理的影响 | 付宇珩; | 东南亚研究 | 例外状态;;国家权力;;新冠疫情;;东南亚;;国家治理 | 新冠疫情深刻影响了东南亚国家治理，各国执政当局以不同的政策应对疫情并产生了不同的后果。然而，单一变量并不足以解释抗疫政策及其影响的国别差异。模糊集定性比较分析的结果表明，死亡病例是决定东南亚国家执政当局有多大动机利用紧急权力确保政治生存的核心要素，是决定抗疫政策严厉程度的必要条件。东南亚国家执政当局应对疫情的具体方式及其作用，则取决于精英分裂程度与政治体制合法性脆弱程度。然而，这两个变量究竟是强化还是削弱抗疫政策的严厉程度，则取决于政治体制本身的结构性制约。其中，政治体制竞争性较强的东南亚国家难以有效应对疫情，但其执政当局利用紧急权力巩固执政地位的可能性更大。 | 2021 |  | 06 | 30-56+154-155 |
| 地方性知识与东帝汶的国族建设 | 康敏; | 东南亚研究 | 东帝汶;;地方性知识;;民族国家;;国族建设;;身份认同 | 在尚未有效建立现代国家集权体制前,东帝汶就进入了吉登斯所说的"民族国家的全球时代",因而其国族建设历程与大多数民族主义研究的经典论述有所不同。作为在2002年才重新取得独立地位的民族国家,东帝汶既面临凝聚人心、建设国民身份认同、提高国家治理能力的任务,也需应对全球化对中央分权和地方自治的要求。本文在借鉴既有研究成果的基础上,通过梳理祖先崇拜、神灵信仰、非对称式联姻制度以及二元政治结构等东帝汶地方性知识体系,论证其在东帝汶的国族建设过程中所发挥的基础性作用。东帝汶的案例说明,国族建设不能被简化为"技术性"问题,政治和经济属性无法替代国族建设的文化属性,而且国族建设需要"自下而上"的草根视角,地方性知识与实践至今仍影响着东帝汶人的身份认同和文化观念,也持续影响其社群关系和社会结构。 | 2021 |  | 04 | 65-87+152-153 |
| 谁解决了查戈斯群岛的主权争端?——“毛里求斯与马尔代夫海洋划界案”初步反对主张判决评析 | 高健军; | 国际法研究 | “毛里求斯与马尔代夫海洋划界案”;;查戈斯群岛;;争端的存在;;“货币黄金案原则”;;主权争端 | 国际海洋法法庭特别分庭在"毛里求斯与马尔代夫海洋划界案"中面对的是一个同时涉及陆地主权归属和海洋划界问题的"混合争端"。然而,查戈斯群岛的主权归属争端竟未能阻止分庭行使对海洋划界争端的管辖权。"查戈斯仲裁裁决"和"查戈斯咨询意见"没有解决查戈斯群岛的主权争端。分庭以一种暗度陈仓的方式移除了这一行使管辖权的障碍。分庭在查明查戈斯群岛主权争端是否存在的过程中评估并否定了当事一方主张的有效性,从而得出主权争端不复存在的结论。分庭的做法超出了查明争端是否存在的管辖权的正当界限,已然构成了对主权争端的解决。鉴于该主权争端涉及第三方,分庭的做法还违反了公认的"货币黄金案原则"。 | 2021 |  | 05 | 4-17 |
| 为确立管辖权对“争端是否被解决”争端的判断——从“毛里求斯与马尔代夫海洋划界案”初步反对意见判决的思路谈起 | 雷筱璐; | 国际法研究 | 海洋划界;;毛里求斯;;马尔代夫;;查戈斯群岛主权争端;;争端解决 | 国际海洋法法庭特别分庭就"毛里求斯与马尔代夫海洋划界案"作出初步反对意见判决。马尔代夫提出了五项初步反对意见,其关键在于英国与毛里求斯存在未决的关于查戈斯群岛的主权争端问题。特别分庭判断查戈斯群岛主权争端是否依然存在的逻辑是判断国际法院咨询意见及联合国大会决议是否已经解决了该争端。特别分庭在毛里求斯和英国对国际法院咨询意见与联合国大会决议的内涵及法律效果存在争端的情况下,通过判断咨询意见及联大决议的内涵和法律效果,认为查戈斯群岛的主权争端已经被解决,实质上涉及了它本没有管辖权的查戈斯群岛的法律地位问题。为确立其管辖权,特别分庭可以对咨询意见和联合国大会决议的内涵和法律效果作出解释,但行使这种权力应秉持审慎态度。国际性法庭或仲裁庭在处理类似问题时,应尽可能避免处理第三方权利问题以及实质处理本没有管辖权的主权问题。该案特别分庭在管辖权阶段考虑争议是否存在时,也不应对双方主张进行实质合法性评估。特别分庭的做法体现了司法能动主义的倾向,值得关注。 | 2021 |  | 05 | 30-42 |
| 国际法上“货币黄金案原则”的再审视：法理演进和实践挑战——兼评“毛里求斯与马尔代夫海洋划界案” | 徐奇; | 国际法研究 | “货币黄金案原则”;;管辖权;;可适用性;;国家同意;;主权争端;;“毛里求斯与马尔代夫海洋划界案” | 随着国际社会日益形成命运共同体,国家间双边争端的多边化趋势明显增强,"货币黄金案原则"的法理及其适用反映了这一趋势。是否适用"货币黄金案原则"应考虑的因素有:第三方的法律利益是否构成现有案件争端的主题事项,并且处理该主题事项的管辖权是否获得第三方的同意;处理第三方的权利和利益是否构成决定审理案件当事方争端的前提和先决条件;如果存在关于当事方或第三方的法律决定,那么这些决定是否构成足以排除"货币黄金案原则"适用的"赋予条件"。在"毛里求斯与马尔代夫海洋划界案"中,尽管国际海洋法法庭特别分庭没有适用该原则,但本案理应符合"货币黄金案原则"的适用条件排除特别分庭的管辖权。该原则在目前的国际法研究中依然具有现实价值和意义。 | 2021 |  | 05 | 55-79 |
| 中国文学东南亚传播的挑战、机遇与路径 | 张经武; | 当代文坛 | 中国文学;;东南亚;;文学传播;;创新路径 | 21世纪以来,中国文学东南亚传播面临的挑战主要有华语水平危机、华文报刊危机、"图像社会"挑战、社交媒体挑战等新的挑战。面临的机遇主要表现为传媒多元化、强势传媒的影响、中国和平崛起和东南亚华人华侨力量的增强等方面。面对这些挑战和机遇,在实践操作层面,中国文学东南亚传播的主要创新路径有"双语+文学"路径、"文学图像化"路径、"主体多元化"路径、媒体整合路径和"国别化+本土化"路径。中国文学东南亚传播,应该立足于建设"文化强国"的远景目标,顺应"讲好中国故事"的时代要求,主动迎接挑战,积极抓住机遇,创新传播路径,在新时代取得更多新进步。 | 2021 |  | 05 | 15-25 |
| 生产、贸易与储备:东南亚粮食安全与中国—东盟粮食合作 | 姚毓春;李冰; | 东南亚研究 | 东南亚;;粮食安全;;粮食生产;;粮食贸易;;粮食储备;;中国—东盟合作 | 作为世界上人口最为稠密的地区之一,东南亚各国历来高度关注粮食安全问题,东南亚既有世界主要粮食出口大国,也有世界主要粮食进口大国,粮食安全在地区安全中的地位至关重要。东南亚主要粮食出口国通过一系列举措,着力发展大米生产,渐次形成了本国粮食生产的比较优势,但由于缺乏成熟的粮食储备体系,其在粮食储备方面并不能满足粮食安全保障的需要;主要粮食进口国通过大力发展海上贸易,构建起以粮食进口贸易为主导的粮食安全保障体系,但由于长期偏重经济增长而忽视粮食生产,生产不足成为其保障粮食安全的最大短板。作为东南亚国家的近邻,中国在粮食安全保障方面与其具有很强的互补性,双方具备加强粮食安全合作的基础。此外,中国要从东南亚各国的粮食安全状况形成过程中借鉴经验、吸取教训,构建集粮食生产、贸易和储备于一体的粮食安全保障体系。 | 2021 |  | 02 | 38-56+154-155 |
| 国家认同视角下东帝汶语言教育政策实施困境分析 | 涂瀞文;吴坚;马早明; | 比较教育研究 | 东帝汶;;语言教育政策;;国家认同;;民族语言 | 东帝汶作为21世纪的新生国家,历史上曾先后受葡萄牙殖民及印度尼西亚的占领统治,形成了语种丰富的语言现象。为了摆脱过去被统治的阴影、构建国家认同,东帝汶自2002年独立之后便十分重视语言教育政策问题。但政府在制定政策时忽视对主体民族语言——德顿语的构建,反而侧重发展原宗主国语言——葡萄牙语,这使政策内容与构建国家认同的目标相背离,对政策实施带来巨大挑战。从主体维度来看,德顿语作为主体民族语言在政策实施中的地位被弱化;从时间维度来看,葡萄牙语出现了集体历史记忆的代际差异;从空间维度来看,葡萄牙语的使用地区有限,无法与广大人民的内在情感产生联系;从权力维度来看,葡萄牙语地位的强化使多数人民被边缘化。 | 2021 | 43 | 04 | 97-104 |
| 普遍差异、殖民主义与未完成的共同体——本尼迪克特·安德森的民族主义想象 | 梁展; | 外国文学评论 | 本尼迪克特·安德森;;共同体;;民族主义;;自由帝国主义 | 本文考察大英帝国殖民官员西·安德森和赫德的中国认同以及《想象的共同体》一书作者本·安德森分别从日本和欧洲殖民者立场对印度尼西亚和南美洲民族主义的阐释,指出本·安德森的普遍民族主义模型忽视了这些国家的地方性和复杂的民族认同方式,其有关民族共同体的想象只是一种自由帝国主义的殖民想象。 | 2020 |  | 04 | 27-79 |
| 中国与“一带一路”沿线国家粮食竞争力比较及粮食贸易影响因素研究 | 韩冬;李光泗;钟钰; | 江西财经大学学报 | “一带一路”;;粮食贸易;;竞争力;;影响因素 | 对中国与"一带一路"沿线国家粮食竞争力及粮食贸易影响因素进行分析,有助于中国改善对外粮食贸易环境,提高自身竞争力。利用2012—2017年中国与"一带一路"沿线国家粮食贸易数据,计算贸易结合度和比较优势指数,并构建双边引力模型和跨栏模型进行计量检验。研究发现:中国仅与"一带一路"部分沿线国家粮食贸易往来密切,对个别国家在具体粮食品种上有一定的竞争力,但不具备区域性的整体竞争优势;良好的经济发展水平和文化交流程度明显促进了双边粮食贸易的开展,而地理距离则对双边粮食贸易造成了明显的阻碍,农业自然廪赋较好的国家与中国双边粮食贸易金额更高;制度距离是影响中国粮食出口决策的重要因素,经济发展水平、地理距离和文化交流程度显著影响了中国粮食出口贸易额。据此,中国应继续推进"一带一路"倡议并依据比较优势原则选择贸易伙伴,强化基础设施建设减少地理距离带来的负面影响,积极推动"民心相通""文化相通",努力实现"政策沟通",减轻制度距离对贸易的阻碍作用。 | 2020 |  | 04 | 76-92 |
| 基于时空维度的我国高校图书馆亚洲文明特色文献资源建设现状分析与思考 | 田稷;聂四维;韩子静; | 图书馆建设 | 时空维度;;亚洲文明;;特色文献/特藏;;资源建设;;知识体系 | 文章基于时间维度与空间维度,采用文献调研法和网站调研法,系统梳理我国高校图书馆亚洲文明特色文献资源的建设情况并进行可视化分析,深度了解我国亚洲文明特色文献建设现状、存在问题和努力方向,以期能为规模化、体系化的亚洲文明特色文献资源体系建设的规划与实践提供参考,为构建中国向世界诠释自己和亚洲的知识体系发挥重要的基础保障与支撑作用。通过分析发现,我国主要高校图书馆东亚特藏和东南亚特藏较为丰富,西亚、南亚和中亚特藏相对缺失;所有特藏19世纪以来的数量明显比之前多,中亚和西亚特藏时间段分布很少;上述缺失部分是系统性补藏的重要方向。 | 2021 |  | 02 | 175-183 |
| 国际争端解决中货币黄金原则的适用 | 曲波; | 当代法学 | 货币黄金原则;;第三方;;争端解决;;国际法院;;国家同意 | 货币黄金原则是在司法实践中确立起来的,当所需解决的重要问题涉及第三方的国际责任,且第三方的法律利益将构成争端的主题事项时,争端当事方或争端解决机构援引该原则排除管辖。货币黄金原则的适用有较严格的条件,之所以如此,是因为争端解决机构要通过行使管辖权对递交给它的案件作出是非曲直的判决,同时也要维护那些没有将案件递交给它的国家的利益,严格条件下适用货币黄金原则可以平衡国家间的利益。货币黄金原则所涉第三方只能是国家;国际仲裁庭与国际法院一样遵循国家同意原则,除非有强制情况,国际法院确立的货币黄金原则在国际仲裁中同样适用;货币黄金原则适用中争议比较大的问题是如何平衡货币黄金原则与对一切义务的关系,当某一问题被识别为对一切义务时,不能将国际社会的法律利益从属于单一国家的国家利益,否则,对一切义务就成为了空谈。 | 2020 | 34 | 04 | 151-160 |
| 宗教对当代东南亚政治的影响初探 | 李晨阳;廖四华;钟小鑫; | 世界宗教研究 | 佛教;;天主教;;伊斯兰教;;当代东南亚;;政治影响 | 东南亚是一个宗教盛行的地区。虽然绝大多数东南亚国家实行政教分离的政策,但宗教对当代东南亚各国政治仍旧产生了不可忽视的影响,全面、客观地评估这种影响力,是推进东南亚政治研究的核心议题之一。本文运用政治学的基本原理,分别从政治主体、政治运转和政治文化三个维度,全面探讨宗教对当代东南亚各国政治的影响方式、影响程度与影响结果。通过研究发现,宗教对当代东南亚各国政治的影响程度,取决于宗教属性、各国的历史与文化以及各国所处的政治发展阶段等变量之间的相互关系。 | 2020 |  | 02 | 28-38 |
| “曼陀罗思想”对印尼外交政策的影响:战略文化的视角 | 王琛; | 东南亚研究 | 战略文化;;印尼;;曼陀罗;;外交政策 | 战略文化对一国的外交政策有着深远的影响。印尼具有悠久的历史,在古代深受印度教和佛教等宗教文化的影响,这其中就包含"曼陀罗思想"的影响。"曼陀罗"是指一种同心圆的结构,由核心与边缘组成,其变化由核心决定,并延伸具备了一种战略文化的内涵。本文对印尼自建国至今历经的外交政策进行整体分析,认为其外交政策变化深受"曼陀罗"这一战略文化影响,在其历经的苏加诺、苏哈托、后苏哈托等不同时期形成了不同的"曼陀罗"结构,并且由于不同时期外交政策的核心不同,其边缘也发生了变化和延展。从战略文化视角对"曼陀罗思想"等进行理论和案例分析,不仅有利于理解印尼的外交政策,而且能够为中国对印尼政策提供相关政策参考。 | 2020 |  | 01 | 69-88+156 |
| 中国在“一带一路”区域的投资结构变化及发展趋势 | 王娟娟;杨冰如; | 中国流通经济 | “一带一路”;;投资结构;;技术寻求型;;能源导向型;;效率导向型;;市场需求型 | "一带一路"区域在中国对外投资中的地位日益重要,投资收益能否得到保障至关重要。以中国在"一带一路"区域投资结构为研究对象,从数量、地区、行业等方面分析投资结构现状,根据投资导向差异,可以分为技术寻求型、能源导向型、效率导向型和市场需求型等四类投资。针对2011—2017年四类投资在中国对"一带一路"区域投资结构中的权重变化,选用熵值法、描述性统计和散点图相结合的分析方法辅助研究,结果显示:第一,受中国能源安全战略和供给侧结构性改革的影响,能源导向型投资和市场需求型投资的权重不断加大,但中国在"一带一路"区域的投资结构未发生根本性变化;第二,技术寻求型投资因沿线国家普遍缺乏先进技术、知识产权保护意识和研究成果转化能力而面临低品质发展的危险;第三,随着互联互通进程的加速,中国的能源导向型投资呈现分散化态势,这有助于中国更好地落实能源安全战略;第四,技术导向型和市场需求型投资有高质量发展的条件和趋势,其中,技术寻求型投资以技术和成本优势为标准正在形成"两升一降"的投资格局,但是有助于中国提升国际竞争力的高效率投资比重小,市场需求型投资以一般贸易和产业链形式可以促使中国与沿线国家经济结构的互补性得到充分发挥,切实在"一带一路"区域形成共享经济体。 | 2020 | 34 | 01 | 90-99 |
| 分权与族群分离运动：基于印尼的分析 | 薛松; | 国际政治科学 | 印度尼西亚;;族群政治;;分离运动;;亚齐;;巴布亚;;地方分权 | 印度尼西亚曾在民主转型期间遭遇严重的族群冲突和族群分离主义的困扰,地方分权制度成功地起到了缓解族群冲突的效果,2005年印尼政府与亚齐独立运动组织也在特殊地方分权的框架下和解。然而与亚齐有着相似背景的巴布亚族群分离运动却在近几年愈演愈烈。为什么印尼不能仿效亚齐的成功经验,与巴布亚重新协商地方分权协议并解决分离问题呢?本文提出,对解决族群分离问题有效的分权应是一种基于平等和自愿的制度安排,必须考虑对话双方进入谈判的限制性条件:对于主权国家,限制性条件往往是存不存在向分离族群作出妥协的政治空间;对于族群分离群体,政治代表权缺位经常是进入与中央政府对话的最主要障碍。本文提出,只有在中央政府有政治空间且族群分离群体的政治代表权明确的情况下,双方才有可能进入真正的分权协议谈判。通过比较亚齐和巴布亚在1998年后的发展情况发现,亚齐问题的解决是政府的政治空间扩大和亚齐独立运动组织获得亚齐人民政治授权的结果,而巴布亚未能进入分权谈判的主要原因是巴布亚精英分化导致的政治代表权缺位。 | 2019 | 4 | 04 | 157-188 |
| 作为方法的东南亚电影 | 王昌松; | 电影艺术 | 东南亚电影;;方法;;东南亚研究;;东南亚电影史 | 本文是以东南亚电影为中介的知识图绘,通过作为自我建构的东南亚电影为方法探析其渐渐形成的文化主体性。殖民时代,电影被介绍到东南亚,但东南亚各国电影的发展情况不尽相同,这里需要建构一种立足世界,内部互通并具有开放特质的东南亚电影论和东南亚电影史。一些东南亚国家的电影业曾经历过狭隘民族主义的挟持,电影市场也不健全。在全球化时代,东南亚国家与世界电影交流频繁,其电影创作者的主体意识明显,出现了东南亚国家电影民族意识的觉醒。 | 2019 |  | 04 | 12-17 |
| 美国对印尼的军事教育培训援助:内容、目标与成效 | 詹林;吴雪艳; | 南洋问题研究 | 国际军事教育与训练项目;;对外军事教育培训援助;;美印(尼)关系;;公共外交 | 作为美国对外军事教育培训援助的关键组成部分,国际军事教育与训练项目(International Military Education and Training Program)由国务院主导,国防安全合作局和国防部共同管理,向盟友和友好国家提供美式军事培训与教育课程。该项目创始于20世纪60年代,发展至今已具有相对完备的法律体系、组织机构及运转模式,体现了美国在对外安全援助领域的创新。基于印度尼西亚的战略价值,美国对其开展的军事教育与训练项目主要围绕人权问题、民主化改革和反恐合作三大议题,以双方认同为基础密切军事联系,以核心人物和利益集团为重点深化美国影响,目光长远、潜移默化地进行思想熏陶并建构"美式认同",推动了美国对印尼政治外交战略的实现,充分体现了对外军事教育培训援助对于实现援助国对外战略的重要意义。 | 2019 |  | 02 | 59-72 |
| 东南亚地区分离运动的发展路径与现实走向研究——以东帝汶、印尼亚齐、泰国南部为例 | 靳晓哲; | 南洋问题研究 | 分离运动;;东帝汶;;印尼亚齐;;泰南 | 长期以来,分离主义不仅是学术界关注的重要议题,也是事关一国主权与领土完整的重要问题。实际上,分离运动不同的起因与分离运动内在的异质性、弱势性密切相关。某种程度上,可以将异质性视为东南亚分离运动产生的逻辑起点。分离运动内在的弱势性又决定了其斗争进程的非对称性,由此弱势性成为理解分离运动发展路径与现实走向的重要起点。基于此,东南亚地区分离运动的主要发展路径分为"国内-国际"与"国内-国际-国内"两种。东南亚地区的分离运动之所以从"国内"开始,是因为分离运动首先是国内问题。此后,在持续的发展进程中,基于最终目标实现与否、是否愿意调整最终诉求等原因,东南亚地区分离运动的现实走向主要分为独立、自治与极端化3种。当然,分离主义的产生并非源自单一因素,其最终走向亦是一个十分复杂的命题,需要学界长期的关注与研究。 | 2019 |  | 01 | 33-46 |
| 中国与东南亚反洗钱多边合作机制构建 | 李春; | 暨南学报(哲学社会科学版) | 中国;;东南亚;;反洗钱;;双边;;多边;;合作机制 | "一带一路"倡议聚焦中国与东南亚命运共同体设制,其中的反洗钱多边合作机制构建具有典型意义。反洗钱涉及防控各类跨境犯罪非法所得及收益的清洗,对命运共同体的社会稳定和经济安全影响深远。理论和实证层面研究皆显示了中国与东南亚反洗钱合作的必要、紧迫和可行,但也面临政治、经济、民族宗教、法律、执法合作等层面的具体障碍。反思现有双多边合作机制,中国与东南亚的反洗钱合作需要深化和创新。结合中国与东南亚的实际情况,从理念基石、组织框架、法律保障、执法合力、借鉴范式、区域金融监管着手构建"小多边"、"中多边"、"大多边"多种形式的反洗钱合作机制,因地制宜,逐步合规,最终形成以中国为主导的行之有效的"1+11"的大多边合作,共同防控跨境犯罪,合力构建行稳致远的命运共同体。 | 2019 | 41 | 03 | 23-41 |
| 东南亚国家海洋划界的政策选择 | 周士新; | 国际关系研究 | 海洋划界;;东南亚;;争端解决;;外交谈判;;国际法 | 东南亚地区大多数国家之间都存在着许多边界争端,这对地区形势和国际关系造成了较大影响。从20世纪60年代开始,由于多方面的原因,东南亚国家越来越关注海洋划界问题,对解决海洋划界问题作出了较大的努力,体现出较明显的务实性、灵活性、合作性和妥协性,并取得了明显进展。东南亚国家主要通过双边或多边谈判方式来解决海洋划界问题,其中既有划定边界的协定,也有未能划定边界的临时安排,大大增强了国家间通过协商解决一些棘手问题的信心。在东南亚国家中,只有缅甸根据1982年《联合国海洋法公约》诉诸第三方争端解决机制解决与孟加拉国的海洋划界问题。从趋势来看,东南亚国家虽然对解决海洋划界问题具有较强的信心和意愿,但它们之间许多海洋划界问题仍有待得到妥善解决,否则将可能成为妨碍它们在更多领域开展多边合作的不利因素。 | 2019 |  | 01 | 13-32+154-155 |
| 2017年东南亚国家“一带一路”五通指数解读 | 陈艺元; | 东南亚研究 | “一带一路”;;东南亚;;互联互通;;五通指数 | "一带一路"五通指数是量化"一带一路"沿线国家"互联互通"水平与进展的综合性指数。本文基于2017年"一带一路"五通指数结果,对"一带一路"沿线东南亚地区11个国家与中国互联互通发展程度进行解读。根据测算结果,2017年度东南亚地区"五通"发展整体情况继续蝉联各大区域之首,区域内一些国家进步明显。东南亚地区整体上属于连通型地区,高于"一带一路"沿线国家整体良好型联通度一个等级。其中,东南亚11国中畅通型国家有4个,占比36.4%,连通型国家4个,互联互通程度处于较高档次的国家占该地区国家数达72.3%。然而,中国进一步提升与东南亚地区的互联互通水平,仍需及时总结实践经验,改进方式方法,注意防范和化解大国竞争、国内政治等内外因素在地区和国别层面的传导和影响。 | 2019 |  | 01 | 113-135+157-158 |
| “一带一路”沿线国家高等教育的发展趋势分析——基于39国的统计数据 | 吕明霞; | 现代教育管理 | “一带一路倡议”;;高等教育;;毛入学率 | "一带一路"倡议为沿线国家之间的经济文化合作提供难得的历史契机。通过非线性回归的方法,对"一带一路"倡议涉及的39个沿线发展中国家的高等教育毛入学率分析后发现,"一带一路"沿线国家高等教育发展模式呈现快速增长型、发展趋缓型和发展波动型,半数左右的"一带一路"沿线国家高等教育模式与我国高等教育发展高度匹配,这为我国中外合作办学提供新的机遇。 | 2019 |  | 01 | 92-97 |
| “转型正义”为何艰难:以东帝汶为例 | 朱陆民;彭琳; | 东南亚研究 | 东帝汶;;印度尼西亚;;转型正义;;人权侵害;;和解 | "转型正义"是奠定一个国家的转型政权的政治合法性的内在需要,也是其民主政治发展成熟的重要里程碑。伸张正义、促进和解、弥合社会裂痕,是"转型正义"的应有之意。然而,从世界范围来看,"转型正义"的落实往往并非一帆风顺,东帝汶亦如此。从1975年12月至1999年10月,印尼军事占领并统治东帝汶24年,对东帝汶人民犯下了屠杀、强奸等惨无人道的罪行,造成数十万东帝汶人丧生。为替受害的东帝汶人民伸张正义,促进和解,将在东帝汶境内犯有严重侵犯人权罪行的犯罪者绳之以法,联合国、东帝汶、印尼分别在东帝汶和印尼开启了东帝汶的"转型正义"实践,建立了相关机构。然而,这些机构在实际运行过程中受到诸多限制和干预,"转型正义"的成效被"打折"。东帝汶"转型正义"进展缓慢,是其自身特性、东帝汶、印尼以及联合国等多方面综合影响的结果。 | 2018 |  | 05 | 108-131+157-158 |
| 中国与东南亚国家贸易潜力及影响因素研究——基于随机前沿引力模型 | 李村璞;柏琳;赵娜; | 财经理论与实践 | 东南亚国家;;贸易潜力;;随机前沿引力模型 | 运用时变随机前沿引力模型和贸易非效率模型,以1998-2016年中国及东南亚九个国家面板数据为样本,测度中国对东南亚国家出口贸易潜力,并分析其主要影响因素。结果表明:1998-2016年中国对东南亚国家出口贸易潜力呈现先上升后下降趋势,依然有较大提升空间,中国对东南亚国家出口贸易潜力差异较大。航空运输货运量、货币自由度、财务自由度、商业自由度及世界贸易组织成员国均对出口贸易非效率具有显著的影响。 | 2018 | 39 | 05 | 122-127+147 |
| 澳大利亚国家图书馆海外文献采集政策研究 | 李剑; | 图书馆建设 | 澳大利亚国家图书馆;;海外文献;;采集政策;;采集实践 | 澳大利亚国家图书馆在其最新的馆藏发展政策中,按地区将海外文献采集政策分为3部分,即亚洲地区、太平洋地区和全球其他地区。政策详细阐述了海外文献涉及的主题、采集方法、采集要旨、采集优先性等问题。借鉴该馆海外文献采集政策及实践,我国图书馆应加强对海外文献采集宗旨与采集细则的研究;应重视对海外非正式出版物、实物和研究级文献的采集;应适应外国习俗与文化传统并借助我国驻外使领馆开展海外文献采集工作;应重视对海外文献的评估。 | 2018 |  | 08 | 47-53 |
| 当代东南亚华人基督徒数量的估算与评析——兼统计东南亚、世界基督徒与东南亚华人数量 | 张钟鑫; | 世界宗教研究 | 东南亚;;华人基督徒;;华人基督教 | 华人基督徒的数量是反映华人基督教发展的重要指标。然而,近20年未有对东南亚华人基督徒数量的完整统计。有鉴于此,本文对1980、1985、1997、2010及2016年东南亚各国华人基督徒数量进行了估算和整理,并对相应时期东南亚和世界基督徒数量、东南亚华人人口数量、东南亚总人口数量等数据进行了统计。通过比较分析发现,近30年东南亚华人基督徒数量有大幅增长,但近15年增速有所减缓;华人是基督教发展较快的族群,且是东南亚基督教发展的主要动力;东南亚仍有一半国家华人基督教发展不容乐观。 | 2018 |  | 01 | 153-168 |
| 中国对东南亚国家基建关联产业出口潜力实证与增长空间估计 | 孙泽生;潘莉; | 亚太经济 | 基建关联产业;;面板引力模型;;出口潜力;;东南亚国家 | 基建关联产业是支撑"一带一路"倡议推进的主要优势产业和依托。本文纳入中国与东南亚国家间文化、地缘相近及中国-东盟自贸区建成等因素,利用面板引力模型首次量化估计中国对东南亚国家基建关联产业的出口潜力和未来出口增长空间。研究发现,中国和东南亚国家的经济增长和文化联系纽带显著促进中国的基建关联产业出口,中国对泰国、印尼和菲律宾等国基建关联产业的出口潜力较大,而其余东南亚国家因经济规模和市场容量较小,出口潜力有限。2017-2021年内中国对东南亚国家基建关联产业出口增长空间大,应重点选取经济规模和市场容量较大、地缘和文化相通性高的合作对象,以充分发挥中国对东南亚国家基建关联产业的出口潜力。 | 2017 |  | 06 | 142-152+188 |
| 澳大利亚与印度尼西亚的战略关系及其地区影响 | 尚子絜; | 太平洋学报 | 澳大利亚;;印度尼西亚;;地缘战略;;前线防卫;;独立积极 | 澳大利亚与印度尼西亚有望在未来深化战略合作。地缘战略是两国战略关系中的重要影响因素,决定了澳大利亚始终有同印尼改善并加强战略关系的动机,并使印尼在南海争端中同澳大利亚拥有部分共同利益。中美战略竞争格局是两国战略关系发展的推动力,催生澳大利亚以海洋战略为核心的新"前线防卫"政策,并增加印尼在"独立积极"外交政策下同各方加强战略合作,甚至做出有倾向性选择的可能性。若两国在未来加强传统安全合作,将对中国周边战略环境造成不利影响。 | 2017 | 25 | 10 | 25-37 |
| 发展和平:联合国维和建和中的中国方案 | 何银; | 国际政治研究 | 世界政治;;联合国;;维和;;建和;;中国方案;;自由和平;;发展和平 | 长期以来,主导联合国维和建和的是生成于西方文明实践经验的自由和平规范。自由和平注重制度建设而对经济和社会发展关注不足,让维和建和陷入维持和建设虚幻和平的困境。中国和平崛起的实践经验蕴含被称作发展和平的规范。通过中国的对外援助和经济活动,发展和平在国际上传播并对维和建和规范体系产生影响。发展和平主张在政治和社会稳定的前提下,以经济建设为中心,通过经济发展带动国家的全面发展,进而消除维和建和东道国国内冲突的根源。发展和平弥补了自由和平的不足,两种和平规范可以互补共生。崛起的中国不仅仅是维和建和规范的学习者和接受者,还是供应者和传播者,发展和平是联合国维和建和中的中国方案。 | 2017 | 38 | 04 | 10-32+3 |
| “一带一路”背景下中国与东南亚国家贸易格局分析 | 宗会明;郑丽丽; | 经济地理 | “一带一路”;;海上丝绸之路;;贸易格局;;HM指数;;中国;;东南亚 | 在文献回顾的基础上,通过大量的数据分析,梳理了2001—2015年15年间中国与东南亚国家贸易发展与格局的演变历程,并采用HM指数对中国与东南亚国家的贸易依赖程度进行了深入分析。结果显示:(1)中国与东南亚国家的贸易额逐年增长。2015年,马来西亚是中国最主要的进口对象,越南是中国最主要的出口对象。马来西亚、新加坡、泰国一直是中国最主要的贸易伙伴,这几年与越南的贸易额增长迅速。(2)中国与东南亚国家的贸易额由逆差逐渐变为顺差,且顺差逐渐增大。(3)中国出口对东南亚国家的依赖程度不断加深,但小于东南亚国家出口对中国的依赖程度,非对称性显著。(4)地理区位、产业结构、关税政策等是影响中国与东南亚国家贸易格局的重要因素。 | 2017 | 37 | 08 | 1-9 |
| 东南亚区域安全治理研究:理论探讨与案例分析 | 张云; | 当代亚太 | 安全治理;;区域治理;;区域大国;;区域建制;;区域连结 | 冷战结束以后,东南亚地区既是国际安全研究的热点,也是区域研究的重要个案,"东盟方式"受到学界关注。"后殖民主义"和冷战研究的相关理论不足以解释东南亚的安全治理。鉴于此,文章把安全治理纳入区域治理研究的视野中,提出区域治理的概念和理论,结合区域建制、区域大国和区域连结之间的变量关系,来分析区域协调和区域管理机制在东南亚的运作。柬越战争和东帝汶危机是东南亚安全治理中的重要事件,文章通过这两个案例分析了东南亚区域安全结构的演化并验证了相关理论,对影响东南亚区域安全治理的变量提供了有现实意义的学理分析。文章认为,东南亚区域安全治理的成功既是大国协调的结果,也是东盟建制化和安全化的结果,区域连结是东南亚区域安全治理的重要指标和评估依据。 | 2017 |  | 04 | 122-151+156 |
| 在历史与地理之间——澳大利亚安全认知与实践的两难抉择 | 杨毅; | 当代亚太 | 安全认知;;美澳同盟;;“亚洲世纪”;;历史传统;;地理 | 自美澳同盟建立以来,两国间的同盟关系不断强化。但由于美澳同盟特殊的历史背景,特别是澳大利亚在外交决策的独立性与结构性限制之间长期存在的矛盾,使其身份定位和国家利益观念的碰撞始终影响着自身安全认知的形成。当战略环境出现变化时,澳大利亚的安全认知就会面临在"历史"与"地理"之间抉择的过程。当前,亚太地区的安全形势正处于不断调整之中,再次使澳大利亚面临着类似的困境。具体到政策选择上,这将对美澳同盟的发展以及中澳关系产生一定影响。 | 2017 |  | 03 | 78-99+159 |
| “一带一路”贸易网络结构及其影响因素——基于网络分析方法的研究 | 种照辉;覃成林; | 国际经贸探索 | “一带一路”;;贸易网络;;网络分析;;QAP方法 | 基于2012年、2014年"一带一路"沿线65个国家的贸易数据,运用块模型及QAP等网络分析方法,对贸易网络结构及影响因素进行了分析。研究发现:(1)动态比较来看,"一带一路"战略实施以来,贸易网络的联系程度得到了显著提升,中国、印度、新加坡处于贸易网络的中心位置;(2)"一带一路"贸易网络可划分为四个贸易板块,中国等21个国家属于双向溢出板块,以色列等20个国家属于经纪人板块,阿富汗等16个国家属于主溢出板块,马尔代夫等8个国家属于主受益板块;(3)国家间的空间邻近关系、文化差异、贸易协定关系、贸易结构及制度差异对于贸易网络具有显著影响。 | 2017 | 33 | 05 | 16-28 |
| 1975年东帝汶危机中美国对印尼的政策--基于美国解密外交档案的分析 | 王琛; | 东南亚研究 | 1975年东帝汶危机;;美国对印尼政策;;援助;;美国外交政策;;冷战 | 1975年东帝汶危机的爆发缘于东帝汶独立革命阵线领导的反对葡萄牙殖民统治的民族独立运动,进而引发大国势力介入,最终导致印尼的侵占。由于印尼独特的地缘战略地位,美国对印尼的政策成为越南战争后美国稳定东南亚地区、遏制共产主义阵营的战略基石。维护美印(尼)战略友好合作关系成为美国对印尼政策的主旨。为此,从危机爆发到印尼对东帝汶的侵占,美国从冷战全球战略出发,以美国国家利益最大化为基准,对印尼实行了默许、支持和加大援助的政策。由此,东帝汶在危机及被占期间发生了严重的人道主义灾难。东帝汶危机期间美国对印尼的政策演变揭示,美国高举的捍卫国际法、民族自决、民主、人权等原则和口号在美国现实主义外交政策面前往往不攻自破。 | 2017 |  | 03 | 93-105+156 |
| 中国与东南亚国家制度距离对投资的影响研究 | 雷瑞; | 经济问题探索 | 制度距离;;东南亚;;比较研究 | 随着经济全球化程度的加深,对外直接投资对我国资本"走出去"的影响越来越大。而目前,国际市场的竞争倾向于表现在国家的制度比较优势。本文基于Kogu和Singh(1988)的研究,运Kogut和Singh指数(Kogut and Singh Index)来计算中国与东南亚国家间的制度距离,选择政治制度、经济制度、法律制度、文化及心理五个方面的指标进行制度距离的测算[1],比较研究中国与东南亚国家制度距离。实证分析表明,泰国、越南和老挝制度距离较近,相对比较适合直接投资,并且中国企业更适合在这三个国家进行绿地投资。而新加坡、东帝汶、文莱和马来西亚这四个国家制度距离则较远。在投资中,中国企业应更多考虑并购,合资或合资中少数股权等方式。 | 2017 |  | 05 | 148-154 |
| 葡属帝汶华人社会的形成 | 彭蕙; | 暨南学报(哲学社会科学版) | 葡属帝汶;;早期;;华人社会 | 中国人最晚于13世纪到过帝汶,当时主要从事贸易活动。明清以后,或贸易,或做劳工,大量华人移居帝汶,与当地土著不断通婚,在这里繁衍生息,从而形成了帝汶早期的华人社会。华人凭借自身的优势,在帝汶从事着各行各业,为当地的经济发展和社会进步做出了巨大贡献。 | 2017 | 39 | 04 | 104-110+132 |
| 民主转型与政治暴力冲突的起落:以印尼为例 | 刘瑜; | 学海 | 民主转型;;民主化;;转型暴力;;政治冲突;;政治文化;;政治宽容;;印尼政治 | 相较于"稳固时期的威权统治",民主转型初期常常是一个政治暴力风险上升的历史阶段。本文指出,尽管民主化同时蕴含暴力加剧和暴力缓解的逻辑机制,但在一个族群分裂的社会,由于民主化初期政治信任格外匮乏,其暴力加剧机制常常早于暴力缓解机制出现。那么,为什么即使在社会分裂的国家,转型期不同国家的暴力冲突水平仍然出现明显差异?即,为什么一些国家比另一些暴力冲突水平高得多?本研究聚焦于政治宽容这个因素,以此来解释多族群社会转型暴力水平的差异。在本文中,政治宽容包括大众文化和精英意识两个维度,并强调其相辅相成性。简单而言,政治宽容水平高的地方,暴力冲突水平低,反之则否。本文以印尼为例,对核心观点进行了论证与说明。 | 2017 |  | 02 | 45-55 |
| 中国东南亚政治研究的反思与建构 | 李晨阳; | 国际政治研究 | 地区与国别政治;;东南亚研究;;比较政治学;;政治发展 | 改革开放以来,中国学术界对东南亚政治的研究经历了起步(1979—1999)和快速发展(2000—2016)两个阶段,目前我国有超过10个以上的实体性东南亚研究机构及数百名学者从事东南亚政治的研究。通过对这两个阶段关于东南亚政治研究的专著、学术论文和学位论文进行检索和分析后发现,我国学者对东南亚政治的研究视角、研究领域和研究深度在2000年以后都有了长足的发展,但也存在研究数量和质量不平衡、理论和方法论水平不高,以及对东南亚各国政局现状和发展趋势的研判不够准确等不足。提高研究人员的理论素养、同时掌握对象国语言与英语、借鉴新的研究方法、实现与国际学术界的接轨是提升我国东南亚政治研究水平的路径。 | 2017 | 38 | 01 | 134-148+8 |
| “一带一路”国家战略与中国工程教育新使命 | 林健;胡德鑫; | 高等工程教育研究 | “一带一路”工程教育;;工程技术人才;;工程教育合作;;国家战略 | 在实施"一带一路"战略构想的背景下,中国工程教育如何担负起在"一带一路"建设中应该担当的使命,以积极推动"一带一路"沿线国家的经贸合作和经济发展,是一项需要认真研究的重要专题。在概述"一带一路"国家战略的基础上,本文首先从经济发展水平和劳动力及受教育情况两方面分析了"一带一路"沿线国家的基本情况;然后分析了沿线国家第二产业、工业基础及其工程教育总体发展情况;接着通过对我国工程教育发展现状、供需矛盾和沿线国家工程教育需求的研究,提出了我国与沿线国家工程教育合作的重点;最后,从国家和高校两个层面提出了推动共建"一带一路"的工程教育行动的建议和策略。 | 2016 |  | 06 | 7-15 |
| 东南亚特色华语词汇的区域和国别比较研究 | 宋飞; | 语言文字应用 | 东南亚;;华语;;词汇;;比较 | 本文基于《全球华语词典》建立数据库,界定并提取出东南亚特色华语词2734个、东南亚特有华语词1183个、东南亚各国特有华语词691个以及同形异义词174个,从词类、词长、语言接触三个维度对前三类词进行量化的比较研究。此外,基于向量空间模型,以算法实现了东南亚华语词汇区的划分,划分结果显示,词汇分区和地理分区存在显著差别。 | 2016 |  | 04 | 108-115 |
| 论澳大利亚的南海战略目标及政策选择 | 冯雷;喻常森; | 国际观察 | 澳大利亚;;南海;;战略目标;;政策选择 | 澳大利亚虽然不是南海争端的直接当事方,近期却积极介入南海事务,体现了其深刻的国家利益和战略目标考虑。一方面,南海是澳大利亚连接与亚洲各国海上贸易的重要运输通道,同时,南海及其周边地区的安全与稳定,也与澳大利亚自身的国家安全息息相关;另一方面,作为美国的重要盟友,澳大利亚积极配合后者实现"重返亚太",钳制中国的战略诉求。同时,作为自命不凡的"中等强国",澳大利亚也希望参与南海多边机制的建立,掌握地区事务的话语权。本文在深入分析相关研究成果和中外文献资料的基础上,旨在进一步探讨澳大利亚南海战略目标形成的原因、政策选择、主要特征及未来走向。 | 2016 |  | 06 | 128-140 |
| 葡萄牙的欧洲化与国家政治发展 | 林娴岚; | 现代国际关系 | 欧洲一体化;;葡萄牙;;欧洲化;;国家政治发展 | 葡萄牙的欧洲化是葡萄牙参与欧洲一体化的动态发展进程。葡萄牙的欧洲化与该国的政治民主化和现代化相互交织、相互促进,虽然历经曲折但始终在向前发展,给当前遭遇疑欧、脱欧主义冲击的欧洲一体化予以有力支持。欧洲化巩固了葡萄牙的宪政民主制度,推动了其经济与社会发展,欧洲化的成果显著提升了葡萄牙的国际影响力以及国内政治的稳定性。然而,葡萄牙的欧洲化面临诸多问题。今后,葡萄牙需要在欧洲化的进程中下大力气解决诸多问题,进而才能保持国内政治稳定,并继续借助欧洲整体的力量真正促进国家结构的调整与综合国力的提升。 | 2016 |  | 08 | 27-32+56 |
| 分离主义的成与败:一项基于质性比较分析的研究 | 郝诗楠;高奇琦; | 世界经济与政治 | 分离主义;;质性比较分析;;原因组合;;脆弱国家 | 当今世界的许多国家中都存在着分离主义的地区或族群。然而,并不是所有分离主义运动都能获得"成功"。通过对15个存在分离主义的案例进行质性比较分析,分离主义倾向或运动转化为独立建国的原因与机制得以厘清。这15个案例既包括分离主义"成功"的"正面案例",也包括了"不成功"的"负面案例"。分析结果显示,存在着两条平行的分离主义实现的路径或原因组合。第一条分离主义实现路径要求同时具备"非民主政体""经济不发达""外部干预"和"国家统一时间短"四个条件;第二条路径则要求同时具备"非民主政体""经济不发达""外部干预"和"分离主义组织的暴力化"四个条件。综合两条路径来看,分离主义成功转化为独立建国的重要机制是:政治与经济双重不发达的"脆弱国家"在面临外部冲击的情况下主动放弃对于分离主义地区的主权,从而让后者实现独立建国。此外,研究结果还显示,分离主义组织是否采取暴力的策略取向并不重要,而国家统一时间的长短对分离主义的成败却有非常重要的影响。 | 2016 |  | 06 | 113-133+159 |
| 东南亚国际货币竞争:经济冲击视角的实证分析 | 徐灼;田鑫; | 现代管理科学 | 人民币国际化;;东南亚;;经济冲击;;SVAR | 文章基于经济扰动对称性的视角,探讨人民币、日元、美元竞争东南亚区域国际货币的优势和劣势。SVAR模型将中国、日本、美国和东南亚国家的经济扰动分解为供给冲击、需求冲击和货币政策冲击。供给冲击是影响各国产出增长率最重要的因素,各国产出增长率对供给冲击的响应方式也具有相似性;而需求冲击在导致各国产出或通胀变动的重要性或相似性上并不如供给冲击显著。相比日本和美国,中国在与东南亚国家的需求冲击对称性方面具有相对优势,但供给冲击对称性方面的相对劣势会减弱人民币对东南亚国家的吸引力、制约人民币的东南亚区域化。 | 2016 |  | 06 | 33-35 |
| 民主化后国家能力的变化——对“第三波”民主化国家/地区的类型学分析(1974-2014) | 刘瑜; | 学海 | 民主化;;国家能力;;第三波 | 民主和国家能力,作为政治发展两个最重要的维度,彼此之间的关系非常重要,也很富有争议。一种流行的看法认为,二者之间具有冲突性紧张关系:民主化会削弱国家能力,而缺乏国家能力不但反过来会影响民主本身稳固的可能性,而且会影响一个国家的社会经济发展,因此,如果必须取舍,应该"国家能力优先"。民主化之后国家能力会降低吗?这是一个理论问题,但同时也是一个实证问题。本文试图采用类型学的方法,对所有的"第三波民主化国家/地区"进行实证性分析。通过匹配第三波民主化以来关于政体和国家能力主要维度的数据库,本文对第三波民主化国家/地区进行分类,将其归入国家能力提升型、削弱型或无变化型,并得出三者的数量比率,从而为进一步的理论分析提供一个实证基础。尤其是,相比笼统地回答这个问题,本文增加了两个观察的维度:第一,国家能力的不同维度在民主化之后会朝着不同方向变化吗?第二,短期的国家能力改变会不同于长期的改变吗?本文最后的发现是复杂的。在国家汲取能力和行政能力方面,第三波民主化国家大多数有所提升,但在强制能力方面,更多的国家会下降。比较国家能力的短期改变和长期改变,并没有发现它们之间有显著的不同。 | 2016 |  | 02 | 153-166 |
| 印度尼西亚海洋划界问题:现状、特点与展望 | 刘畅; | 东南亚研究 | 印度尼西亚;;海洋划界;;安巴拉特海;;《珀斯条约》 | 印度尼西亚的海洋划界问题关系到印尼的核心利益,印尼从20世纪60年代末就开始与相关国家谈判,迄今至少还有五个比较重大的问题需要解决。印尼在处理海洋划界问题时,注重《联合国海洋法公约》的作用、谈判定力较强以及乐于参加国际海洋合作这三个特点得到较为明显的体现。印尼总统佐科提出的"全球海洋支点"愿景一方面展示了印尼在海洋划界谈判中维护本国国家利益的决心,另一方面也加大了解决问题的难度。 | 2015 |  | 05 | 35-40 |
| 东盟国家在国际冲突管理中的行为选择 | 曾晓祥; | 世界经济与政治论坛 | 东盟规范;;冲突层级;;冲突管理;;行为选择 | 在东盟介入地区冲突管理的过程中,地区规范和国际冲突管理的一般手段程度不同地发挥着作用。东盟冲突管理的行为选择,根据冲突的区内、区际和区外层级的差异,以及冲突对东盟安全和其他利益的影响程度,而呈现出明显的变化。地区规范的适应性主要体现在东盟成员国之间的冲突管理,对于其他层级的冲突,地区规范的适应性呈迅速衰减的趋势,显示出当前东盟国家冲突管理行为的多元化特征。 | 2015 |  | 04 | 19-28 |
| 东盟冲突管理方式:概念、挑战与变革 | 贾力楠; | 当代亚太 | 东盟;;冲突管理方式;;主权融合 | 东盟冲突管理方式以尊重成员国主权为前提,通过协商一致和第三方调解等方式促进以非暴力方式解决争端,其着力点是通过塑造规范、促进合作等方式预防冲突的发生。东盟冲突管理方式的无力性集中体现在对成员国国内冲突的管控上,其根源在于成员国在融入区域性集体机制的同时仍坚持个体化的主权践行方式。主权融合基础上的制度建构与实体资源配置将是东盟提高冲突管理效能的路径选择。 | 2014 |  | 06 | 132-155+159 |
| 中国对东南亚直接投资环境分析 | 高清; | 现代管理科学 | 东南亚;;投资环境;;评价指标体系;;多指标综合评价法 | 国内竞争的不断加剧,使得许多投资者的目光聚集到了国外。随着中国—东盟自由贸易区的建立使得我国与东南亚地区经济合作不断加深。我国企业向东南亚地区进行投资不仅促进中国与东盟地区紧密合作,同时对促进我国实施"走出去"战略具有重要意义。文章结合近年来中国对东南亚投资现状,通过多指标综合评价法对东南亚各国的投资环境进行分析,为我国企业向东南亚地区进行投资提供参考建议。 | 2014 |  | 12 | 46-48 |
| 东亚民主的质量:测量与比较 | 李辉; | 开放时代 | 东亚;;民主质量;;测量;;比较研究 | 本文是对东亚第三波民主化以来的七个国家和地区的民主质量进行的一项测量研究。在测量维度的选择上,借用了莱文和莫琳娜对拉美国家民主质量测量的最新方法,并针对东亚民主化的特征和数据的可操作性做了一定程度的调整,最终使用选举质量、政治参与、责任性、回应性和文武关系作为测量的主要维度,并给出了我们对于东亚民主质量的测量结果。 | 2014 |  | 05 | 129-141+7-8 |
| 美国重返亚太背景下的美澳同盟 | 程鹏翔; | 太平洋学报 | 重返亚太;;美国;;澳大利亚;;美澳同盟 | 在美国重返亚太的背景下,美澳同盟得到了进一步强化,其原因包括:从美国的角度看,澳大利亚拥有极佳的战略地理位置,美军急需加强亚太二三线基地群的建设以拓展自己的战略纵深,通过驻军的方式减少澳大利亚"变节"的可能性;从澳大利亚的角度看,出于对中国崛起的不适应,在大幅削减国防预算的情况下需搭美国"便车"以更好地寻求安全庇护,迎合其国内军事战略转移——实施"印-太"战略的需要。本文认为,美澳同盟在美国重返亚太的过程中,虽起到了非常重要的基石、通道、支撑和补充作用,但美澳间依然存在着难以克服的同盟困境。 | 2014 | 22 | 03 | 29-42 |
| 东南亚宗教的特点及其在中国对外交流中的作用——兼谈东南亚华人宗教的特点 | 刘金光; | 华侨华人历史研究 | 东南亚;;宗教研究;;华人宗教;;宗教意识;;对外交流 | 论文介绍了东南亚国家宗教的基本情况和特点,阐述了东南亚区域发展中宗教在整合意识形态、维护地区国家主权、促进地区经济合作与交流等方面的积极作用,进而对宗教在促进中国与东南亚国家交流中的积极作用提出了具体建议。认为儒教、道教、佛教作为维系华人社会的重要纽带,促进着华人社会的稳定和发展,对儒教、道教、佛教的宗教感情实际上寄托了华人的民族感情。东南亚华人宗教与中国传统宗教血脉相连,要在平衡发挥五大宗教作用的基础上,注重发挥东南亚国家华人宗教在与中国交流中的独特作用。 | 2014 |  | 01 | 28-33 |
| 争议海域油气资源共同开发经验剖析及对我国的启示 | 黄庆波;王孟孟;李焱; | 国际贸易 | 争议海域;经营模式;共同开发区;共同开发协定;对我国的启示;油气资源; | <正>据估计,全球海上石油资源储量约占全球石油资源总量的34%,其中已探明储量约380亿吨,海洋天然气资源储量约140万亿立方米,已探明储量约40万亿立方米。与此同时,争议海域油气资源共同开发的国家实践也成为一种普遍现象。到目前为止,已经达成的海域共同开发协定超过20个。共同开发虽然不能完全解决海洋划界争端,却是解决海上资源开 | 2013 |  | 12 | 28-33 |
| 国外公民投票制度的实践困境透视 | 胡鸿晓;赵宝云; | 思想理论教育导刊 | 选举民主;;公民投票制度;;实践困境 | 国外公民投票制度在实践中陷入五重困境:一是公民投票结果在体现民主制度的"多数原则"上有时陷入困境;二是公民投票结果在实现民主决策的正确性和科学性上有时陷入困境;三是公民投票在实现决策有序化、保持社会稳定上有时陷入困境;四是公民投票制度在降低民主决策的时间成本、提高民主决策的效率上有时陷入困境;五是公民投票结果在付诸实践生成法律效用上有时陷入困境。 | 2013 |  | 11 | 49-53 |
| 美国在东南亚推广“普世价值”的成效评估及前景 | 闫坤; | 太平洋学报 | 美国;;东南亚地区;;“普世价值”;;成效评估 | 东南亚地区不论是从地理位置、经济发展潜力,还是从意识形态发展方面,在美国的亚太战略中都占有重要地位。为了配合美国在全球的反恐战争、充分利用东南亚地区的经济发展优势以及平衡中国在这一地区的影响力,美国在东南亚地区推广"普世价值"就显得尤为积极。美国通过加强公共外交、提供附加条件的经济援助以及拓宽军事领域合作等途径,潜移默化地将"普世价值"灌输到东南亚地区。受此影响,东南亚一些国家民主制度渐趋成熟,自由、人权状况有了很大改善,地区人权组织也建立并开始发挥作用。但是,由于美国在此过程中夹带私利,加之东南亚地区特有的历史经验和文化特征,使得"普世价值"的传播大打折扣。 | 2013 | 21 | 10 | 47-59 |
| 南海争议海域油气资源共同开发的困境与出路 | 张丽娜; | 海南大学学报(人文社会科学版) | 南海;;争议海域;;油气资源;;共同开发 | 南海争议油气资源共同开发面临诸多问题:争议当事方数量众多、争议海域界限模糊、争议海域的法律属性不明确、争议海域涉及众多岛屿等。但南海争议海域油气资源仍然存在共同开发的可能性,一方面,争端各方存在共同开发的意愿,另一方面,争议各方对共同开发模式具有广泛共识,单独开发面临一定的障碍。但南海争议海域共同开发不宜采用多边共同开发的模式,应在双边谈判的基础上,遵循由易到难的原则,达成共同开发协议。 | 2013 | 31 | 04 | 13-20 |
| 高慢低快:2012～2013年的东南亚经济——兼谈中国—东盟经贸关系 | 古小松;杨超; | 亚太经济 | 东南亚经济;;中国—东盟经贸 | 在全球经济危机持续的大背景下,2012年东南亚经济仍然保持快速增长,比全球平均水平的3.3%高出2个百分点。推动东南亚经济增长的主要因素是内外投资增多、消费需求扩张、经济转型加速。展望2013年,东南亚经济增长动力未有大的改变,仍会保持稳中微升趋势。中国对东南亚经济发展的影响也日渐增大,中国与东盟贸易额创下新高,投资合作增加。双方合作互利共赢,合作的潜力仍然很大。 | 2013 |  | 02 | 16-22 |
| 从外部排名看苏西诺执政以来印尼的内部变化 | 刘鹏;胡潇文; | 世界经济与政治论坛 | 印尼;;苏西诺;;排名;;评估 | 2004年以来,苏西诺执政下的印尼经济出现了较快的增长,其经济增长速度并未受到2008年以来的国际金融危机的影响;这使各方对印尼发展的乐观预期大为流行。本文试图超越单一维度的经济发展速度评价,引入评价一国发展的其他量化指标和排名,从外部排名的变化看苏西诺时期印尼的发展变化。本文认为印尼虽然在苏西诺时期取得了一些进步,但印尼的国内安全稳定、反腐和发展仍然任重道远。 | 2013 |  | 02 | 66-90 |
| 一次卓有成效的国家实践——200海里外大陆架法律制度下澳大利亚划界案的实证分析 | 潘军; | 太平洋学报 | 澳大利亚划界案;;大陆架界限委员会;;200海里外大陆架;;国家实践 | 200海里外大陆架外部界限的划定,在《联合国海洋法公约》奠定的新的世界海洋秩序中意义重大。经联合国大陆架界限委员会对澳大利亚划界案审议并通过划界建议书后,使澳大利亚成为了世界上第一个能够依据国际法而使本国大陆架得以延伸至领海基线200海里以外的国家。澳大利亚划界案是迄今提交的最为复杂的划界案,整个过程中所体现出的高超的技巧、务实的态度、与周边国家的协调、充分的数据、灵活低调的外交策略等,为其他正在准备提交划界案的国家,提供了十分宝贵的科学和法律实践。 | 2012 | 20 | 08 | 66-79 |
| 论澳大利亚的国际难民政策 | 李其荣; | 山东大学学报(哲学社会科学版) | 澳大利亚;;难民政策;;难民政治问题 | 澳大利亚对于外来移民持欢迎态度,其难民政策带有宽容性和包容性,在安置难民方面发挥了一个发达国家的重要作用。但是,在美国经历9·11事件以后,澳大利亚政府从国家安全考虑,进一步采取法律手段加强了政策控制,控制的后果是损伤了澳大利亚的国际声誉。日前,难民政策问题已成为澳大利亚朝野争论的热点问题。 | 2012 |  | 03 | 103-109 |
| 新时期印度尼西亚全方位外交战略解析 | 闫坤; | 东南亚纵横 | 印尼;;全方位;;外交战略 | 面对着不断变动的国际政治格局,为了更好地维护国家安全利益,促进国内经济发展,印度尼西亚的外交战略在坚持"独立、积极"原则的基础上也适应新的形式有所调整。苏西洛在2009年成功连任印尼总统,这使他有机会继续引导印尼的外交政策方向。印尼的外交战略从苏西洛第一任期的"在波涛汹涌的大海中航行"发展到现在的"全方位外交",即以重树在东盟的领导权为基础,积极开展双边和多边关系。 | 2012 |  | 01 | 13-19 |
| 如何推进南海共同开发?——东南亚国家经验的视角 | 邵建平; | 当代亚太 | 南海;;共同开发;;东南亚国家;;经验和启示 | 东南亚国家中的泰国、越南、马来西亚、印尼、东帝汶先后成功地在相互之间或与区域外国家间的争议海域实施了共同开发。中国早在20世纪80年代就提出运用共同开发处理南海问题的原则,但截至目前,这一原则并没有得到成功地实践和推进。文章在分析东南亚国家共同开发争议海域相关经验的基础上,结合南海争端的现状,探讨了东南亚国家的经验对推进南海共同开发的启示。 | 2011 |  | 06 | 141-158 |
| 国家人权机构对国家行政机关关系研究 | 杨成铭; | 政法论坛 | 国家人权机构;;国家行政机关;;补充;;监督 | 国家人权机构对国家行政机关的关系是洞察国家人权机构在国家政权结构中的地位和作用的重要"窗口"。部分国家行政机关发起或参与国家人权机构的创立。国家行政机关的行政行为往往属于国家人权机构管辖和调查的对象,国家人权机构可以调解国家行政机关与申诉人之间的人权纠纷,部分国家人权机构还可就国家行政机关的行政行为是否侵害人权作出决定,并可对救济人权的方法提出建议或作出决定,少数国家人权机构还可执行上述决定。总体来看,国家人权机构的工作是对国家行政机关人权保护工作的补充,这种补充在很大程度上是通过对国家行政机关的人权保护工作实施监督来实现的。 | 2011 | 29 | 06 | 107-117 |
| “政府犯罪”对“国家犯罪”的替代性研究——国际刑法框架内基于理论和实例的结论 | 钱晓萍; | 中国刑事法杂志 | 政府犯罪;;国家犯罪;;国际犯罪;;可替代性 | 在国际法层面,政府行为通常归于国家行为,所以政府犯罪被视为国家犯罪。然而国家犯罪较普通国际犯罪有更严格的判断标准,只有基于政府行为或在政府渎职的情势下才能实现;反之政府犯罪可能因政府行为违反法律,严重伤害本国人民和国家的利益,而超越国家犯罪,独立存在;所以"政府犯罪"包含"国家犯罪"。理论论证和实例研究证明:在现有的国际刑事责任体系中,"政府犯罪"概念有可能在法理和实践层面替代"国家犯罪"概念。 | 2011 |  | 09 | 105-113 |
| 冷战后美国东南亚政策的调适 | 白雪峰; | 厦门大学学报(哲学社会科学版) | 美国外交;;东南亚;;后冷战时代 | 冷战后,在全球化进程的加速推动下,美国把开放市场和自由贸易作为其在东南亚的外交重点。随着东南亚区域重要性的提升和区域主义进程的深化,美国开始酝酿并着手制定对东南亚的长期外交战略:一定程度的军事存在以保障其区域利益安全;在巩固和加强现有区域同盟关系的基础上,进一步发展新的伙伴关系和双边关系;积极参与东南亚的区域主义进程并通过各种机制和合作方式影响这一进程;警惕和防止其他力量对美国在这一区域的利益构成威胁。通过这些战略,美国试图在东南亚地区取得主导地位,建构符合美国意愿的秩序,维护并实现其利益。 | 2011 |  | 04 | 86-93 |
| 冷战后东盟对西方人权压力的反应及其影响 | 于臻; | 东南亚研究 | 西方压力;;人权;;东盟;;反应;;影响 | 冷战结束后,以美国为主的西方社会不再对东南亚进行直接的军事干涉,而是增加了以人权为借口和手段对东盟施加的压力。面对西方压力,东盟在不同阶段作出了不尽相同的反应。在东盟与西方博弈以及走向一体化的过程中,人权逐渐演变为东盟的重要议题之一,已经并将继续对东盟的发展产生一些不可忽视的影响。 | 2011 |  | 01 | 52-60 |
| 澳大利亚与东南亚关系研究述论 | 甘振军; | 东南亚纵横 | 澳大利亚;;东南亚;;国际关系 | 随着澳大利亚白皮书明确将其与美国、日本、中国和印尼的关系列为最为重要的四大外交关系,学术界日益重视对澳大利亚对外关系和外交决策的研究。本文对近年来我国学术界对澳大利亚与东南亚关系的研究进行回顾和评析,并提出一些学术设想。 | 2011 |  | 01 | 64-68 |
| 后苏哈托时代的印尼军人政治 | 梁孙逸; | 东南亚研究 | 印尼;;军人政治;;双重职能;;合法性 | 印尼前任总统苏哈托时期(1966—1998年)所提倡的双重职能(dwifungsi)军政一体化教条随着印尼民主化进程而结束,军人参政失去了合法性来源。改革派政治领袖如前任总统瓦希德执政时期(1999—2001年)和梅加瓦蒂时期(2001—2004年)积极建立以文人统治为主的政府。军人参政在印尼民主化时代似乎不会再出现。然而,在苏哈托专政时期享有崇高政治地位的印尼军人未能完全接受民主化时代的文人统治模式。许多具有军人背景的政治人物开始以不同身份和方式试图重返政治舞台,充分利用民主化时代的机制来宣扬自己的理念和政治纲领,寻求民众对他们的支持。本文探讨印尼军人在后苏哈托时代,如何利用民主选举方式寻求合法性,以及将来可能带来的影响。 | 2010 |  | 05 | 22-26 |
| 人民自决权与国家领土完整的关系 | 赵建文; | 法学研究 | 人民自决权;;国家领土完整;;单方面分离;;国际法 | 人民自决权与国家的领土完整是统一不可分割的;人民自决权不具有改变现有国家边界的效力;国际法不承认一国的少数人民通过自决实行单方面分离的一般权利;国际法尚未肯定也未否定"救济性分离权";国际法承认有关各方经自由协议达成的分离安排的合法性;国际社会应当通过多种途径实现人民自决权与国家领土完整的和谐统一;有关国家应当依照国际法解决因单方面分离行为而引发的冲突。 | 2009 | 31 | 06 | 174-192 |
| 论澳大利亚与印度尼西亚关系之变迁 | 蒋保;吕乔; | 东南亚纵横 | 霍华德;爆炸事件;澳大利亚;堪培拉;印度尼西亚;东帝汶; | <正>1950～1962年西伊里安(West New Guinea)归属问题爆发,澳大利亚与印度尼西亚关系开始不和。1995年澳大利亚与印尼秘密签订《共同安全合 | 2009 |  | 10 | 43-47 |
| 试析东南亚各国投资环境及中国企业对东南亚的投资 | 聂槟; | 东南亚纵横 | 东盟成员国;外国投资者;东帝汶;全球竞争力报告;税收优惠政策;外资总额;外国直接投资;吸引外资; | <正>进入21世纪以来,东南亚各国经济发展势头良好,已成为世界上的一个投资热点。而对于中国企业来说,这一区域尤其具有投资吸引力。首先,东南亚与中国具有地缘优势,地理位置相邻,文化背景相似,因此,中国政府鼓励企业前往东南亚投资发展, | 2009 |  | 09 | 3-9 |
| 1976年以来东帝汶的非常规死亡人口与难民 | 吴梦珊;李一平; | 南洋问题研究 | 东帝汶;;死亡人口;;难民 | 1975年东帝汶发生内战,随后印尼入侵并在当地展开高压统治20余年。根据拙文中的人口变化曲线图,印尼占领期间东帝汶出现了大批非常规的"失踪人口",主要分为死亡人口和难民两部分。印尼官方并没有对此进行过系统的调查,其公布的当地人口总数也笼统地把1980年后迁移至东帝汶的印尼人包含在内,妨碍了国际社会调查与还原东帝汶在印尼统治期间出现大批非常规死亡人口的历史。 | 2009 |  | 03 | 83-90 |
| 东帝汶的语言问题及其对教育的影响 | 郑蔚康; | 东南亚研究 | 东帝汶;;语言;;教育 | 东帝汶尽管还很年轻,是个新生的国家,但却有着漫长的历史和独特的文化。作为一个多语言、多民族的国家,东帝汶目前至少有16种本土语言。自2002年独立之后,东帝汶开始建设自己的国家,其中,语言问题不容忽视。本文研究了东帝汶的语言历史和现状,以及语言对其教育的影响。 | 2009 |  | 02 | 87-92 |
| 国际法上自决性公民投票刍议 | 王英津; | 国际关系学院学报 | 国际法;;自决;;自决权;;人民主权;;公民投票 | 国际法上的自决性公民投票与国内法上的民主性公民投票有着重要的不同,它有自己独特的适用范围和条件。它的国际法渊源是自决权原则、国际条约和国际组织决议。它的合法性要件包括有合法的理由、出于自愿和联合国的监督。它的基本形式有领土归属性公民投票和领土独立性公民投票。通过实证分析,我们可以更好地把握自决性公民投票在国际法上的适用及其规则,防止其被分离主义势力所利用。 | 2009 |  | 01 | 51-57 |
| 20世纪60～70年代澳大利亚与印度尼西亚关系的调整 | 张秋生; | 东南亚纵横 | 东帝汶;澳大利亚;印度尼西亚; | <正>长期担任孟席斯内阁部长、后出任澳大利亚驻美大使的霍华德·比尔指出:"印度尼西亚是我们第一关注的国家。澳大利亚政府没有在公开场合更多谈论对这个新独立国家感兴趣的程度,但是,在我们考虑问 | 2008 |  | 10 | 18-21 |
| 美国对印度尼西亚军政关系民主化改革的影响 | 仇朝兵; | 美国研究 | 美国外交;;印度尼西亚;;民主化改革;;军政关系 | 美国政府行政和立法部门及非政府组织为推动印度尼西亚军政关系民主化改革都做出了努力。美国政府在双边高层交往中不断对印尼政府和军方施加外交压力,促其改革;包括国务院、国际开发署、国防部、司法部等在内的行政部门,实施了一系列项目,旨在推动印尼的军政关系制度建设,支持培育印尼民主的军政关系文化;国会以立法手段或向行政部门施压的方式约束美国对印尼的军事援助及两国军事关系,意在通过制裁和压力迫使印尼进行军政关系改革;美国的非政府组织也以各种方式参与了推动印尼军政关系改革、促进形成民主的军政关系文化的活动。这些部门和组织广泛而深刻的卷入,在很大程度上推动了印尼的军政关系民主化改革,也可以充分说明美国在对外扩展民主时投入之大、关注之广、手法之细腻。 | 2008 |  | 03 | 98-118+5-6 |
| 从《东盟宪章》看“东盟方式”的变革与延续 | 谢碧霞;张祖兴; | 外交评论(外交学院学报) | 东盟;;《东盟宪章》;;“东盟方式” | 第13届东盟首脑会议正式通过了《东盟宪章》,宣告东盟组织具有法律人格地位,正式赋予东盟作为国际谈判和处理国际事务主体的法律地位。"东盟方式"是影响《东盟宪章》制定的重要因素。一方面,随着地区一体化进程的深入,"东盟方式"越来越限制东盟的发展,东盟日益显得效率低下,行动迟缓,无力应对地区问题,在民主、人权等国际社会关注的事项上也难以发挥积极作用,区域社会经济一体化的进程也是举步维艰。这些都要求东盟对其"东盟方式"进行变革。另一方面,东盟成员国之间存在巨大差异,任何激进的超国家机构建设都有可能招致成员国的抵制,造成东盟的分裂,因此,为了维护东盟内部的政治团结,"东盟方式"仍将是东盟运作的基本模式。《东盟宪章》就是在对"东盟方式"变革的张力与延续的惯性下制订出来的。 | 2008 |  | 04 | 37-44+4 |
| 后苏哈托时代印尼军队的改革 | 刘相骏;皮军; | 南洋问题研究 | 后苏哈托时代;;印尼军队;;现代化改革 | 印尼军队的改革主要是解决军队"双重职能"的问题。印尼军队的改革随着国家领导人的更迭以及军队内部派系斗争而呈波浪形轨迹发展,但总的趋势是往"军队非政治化与政治过程非军事化"的方向发展。军队的改革经历了哈比比与瓦希德执政时期的混乱,以及梅加瓦蒂时期的停滞不前之后,随着倾向于改革的苏西洛成为总统再一次提上日程。到目前为止已经在军政关系、军队职能立法、军队结构重组等方面取得了不少成就。影响印尼军队改革因素主要是印尼政府与军队以及军队内部之间的权力斗争、国内族群冲突与地区分离主义运动、军队经费不足、军队参与政治的传统等。 | 2008 |  | 01 | 48-55 |
| 论东盟对不干涉原则的突破与发展 | 李伯军; | 求索 | 东盟;;不干涉原则;;东盟道路 | 国家主权平等和不干涉内政原则是东盟历来坚持和奉行的基本原则。然而,自冷战结束以来,由于许多地区性热点问题以及全球性问题的出现,东盟在一体化的道路上开始日益倾向于突破该原则的框架,主张在该区域内实施建设性的干预。但由于东盟内部差异和分歧较大,实施建设性干预可能会引起成员国的强烈反弹。因此,如何在坚持不干涉内政原则和最大程度地发挥东盟在该地区的作用之间进行平衡,这对东盟来说是一个重大的挑战。 | 2007 |  | 12 | 96-98 |
| 中日东海共同开发的问题与前瞻 | 贾宇; | 世界经济与政治论坛 | 中日关系;;东海问题;;共同开发 | 本文扼要回顾了中日东海共同开发问题的历史,论述了共同开发的法律内涵和共同开发的国际实践,在上述基础上,进一步分析了中日东海共同开发的前景。文章认为,共同开发是相关海域划界前的一种临时性安排,政治意愿是正义共同开发的关键因素。目前制约中日东海共同开发进程的核心问题是共同开发区的确定,日方的主张既不符合国际法理,也不符合国家实践。 | 2007 |  | 04 | 49-54 |
| 浅析冷战后美国与印尼军事关系的演变 | 王良生; | 南洋问题研究 | 冷战后;;军事关系;;权力;;身份 | 冷战结束后的15年中,美国与印尼的军事合作关系发生了显著变化:由中断到恢复、不断升温。现实主义的权力观根据国际环境发生变化后国家利益的侧重点也会变化这一视角进行解读。建构主义认为,观念会影响身份的建构,美国与印尼观念的变化对它们身份和军事合作产生了重要影响。美印(尼)军事合作关系的恢复和升温,对东南亚地区安全环境将产生深远的影响。 | 2007 |  | 02 | 28-33+82 |
| 九一一事件后美国对印度尼西亚的公共外交 | 仇朝兵; | 美国研究 | 美国外交;;九一一事件后;;公共外交;;印度尼西亚 | 九一一恐怖袭击事件让公共外交在美国对外政策议程中的重要性被再次凸现出来。在推行对印尼的公共外交时,美国既重视短期目标与长期效果的统一,也注意到传统外交与公共外交之间的相互作用与影响。美国加强对印尼这个世界上最大的穆斯林国家的公共外交,首先是出于九一一事件之后国际反恐的需要,意在消解印尼民众的反美情绪,尽可能降低极端主义和激进穆斯林的影响,改善美国的形象;但随着亚太地区形势的变化,美国对印尼的公共外交又被注入更多的地缘政治因素。由于存在各种复杂因素,评判美国对印尼的公共外交时,既要重视其对短期内改善美国形象所发挥的作用,更要关注其长期效果,特别是对形成印尼精英层稳定的美国观所发挥的作用。同时,还应注意传统外交与公共外交的相互作用。 | 2007 |  | 02 | 83-100+5 |
| 中国参与东帝汶维和的原因及立场分析 | 牛仲君; | 外交评论(外交学院学报) | 东帝汶问题;;联合国维和行动;;“人道主义干预” | 1999年东帝汶骚乱的发生是科索沃战争之后影响东亚安全的第一个热点问题。2000年1月,应联合国要求,中国政府向东帝汶过渡行政当局(UNTAET)派遣了民事警察,这是中国政府首次派出民事警察执行联合国维和行动。中国对东帝汶维和的积极参与,使东帝汶问题能够在联合国的框架内得到合理解决,维护了联合国在维护国际和平中的核心地位及东亚的地区稳定。本文将从中国与东帝汶的关系入手,结合对东帝汶维和的参与过程,分析中国参加此次联合国维和行动的原因和对“人道主义干预”问题的基本立场。 | 2007 |  | 02 | 48-53 |
| 冲突管理的东盟方式 | 唐志明; | 东南亚研究 | 冲突管理;;国际冲突;;东南亚;;东盟方式 | 如何有效预防和解决国家间冲突,维护地区及全球的和平与稳定,这一直是战后国际社会和区域主义实施冲突管理的基点与诉求。东盟根据联合国宪章、万隆会议精神和其他国际法基本准则,结合东南亚国家的冲突管理实践,制定和实施了一套被誉为能够体现东盟方式基本特性的冲突管理模式。本文主要考察了国际冲突管理的理论分析框架,东盟冲突管理的基本原则、冲突类型及其管理方法以及后冷战时代东盟冲突管理所面临的挑战。 | 2007 |  | 02 | 38-43 |
| 当前东南亚形势浅析 | 何胜;张学刚; | 现代国际关系 | 东南亚;;东盟;;地区形势 | 东南亚地区形势呈稳定与非稳定双重因素并存且大体均等的特点,虽动荡不断,但演变为地区性动荡和整体性失控局面的可能性不大。政治上,该地区总体保持稳定,个别国家动荡;经济上,发展势头强劲,地区整合加速;外交上,大国角逐加剧,东盟巧施平衡;非传统安全上,挑战增多,合作加强;对华关系上,双方的战略伙伴关系得到迅速提升。未来将以“求稳定、谋发展、迎变革、搞平衡、促整合”为主要趋势。 | 2007 |  | 03 | 51-55+62 |
| 浅析东帝汶阿尔卡蒂里政府的合法性问题 | 覃薇; | 东南亚研究 | 合法性;;东帝汶;;阿尔卡蒂里政府 | 2006年的东帝汶骚乱凸现了阿尔卡蒂里政府的合法性危机,政府也因此而垮台。合法性包括规范要素、程序要素、绩效以及同意四个要素,如果其中一个要素缺乏,就会引发合法性危机。阿尔卡蒂里政府是随着东帝汶的独立而成立的,得到了国际和国内社会的同意,并且是由选民依宪法选举而产生的。然而,作为东帝汶的首届政府,它并未能有效解决民众最为需要的民生问题,特别是经济绩效低下,最终引起民众认同危机而导致垮台。 | 2007 |  | 01 | 26-29 |
| “合作安全”与东南亚安全区域主义 | 郑先武; | 国际论坛 | 合作安全;;综合安全;;安全机制;;安全区域主义;;东盟;;东南亚 | “合作安全”作为冷战后东南亚安全区域主义实践中一种最重要的安全机制,它是西方“共同安全”观和本区域“综合安全”观融合的产物。“东盟方式”是其运行的基本程序。在实际运行中,它表现出明显的军事、政治、经济、社会和环境等多领域的互动;东南亚国家、东盟、“自然经济区”等市场组织和“第二轨道”等公民社会组织以及外部的区域间组织都在其中发挥着重要作用,由此形成一种多领域和多元行为主体的综合性特征。 | 2007 |  | 01 | 73-78+81 |
| 中国的东南亚研究:成就、视角与问题——以三家高校学术期刊的比较研究为基础 | 张振江; | 东南亚研究 | 东南亚研究;;《东南亚研究》;;《南洋问题研究》;;《亚太评论》 | 本文选取《东南亚研究》、《南洋问题研究》和《亚太评论》三份学术期刊,根据东南亚问题研究论文的载文量、内容(国别与主题)和作者三个指标,对这三份刊物2000—2005年的载文进行了统计、对比与分析,并由此管窥中国东南亚研究的成就、视角与问题。 | 2006 |  | 04 | 24-30 |
| 印尼-澳大利亚关系中的东帝汶因素 | 宋效峰; | 南洋问题研究 | 印尼-澳大利亚关系;;东帝汶;;地缘政治 | 东帝汶尽管是东南亚地区一个刚刚取得独立的小国,但它在地缘政治中的重要性却不可小视,在东帝汶未独立前它就开始成为影响印尼-澳大利亚关系的一个重要变量。在东帝汶独立过程中,从各自的国家利益和地缘目标出发,印尼和澳大利亚进行了一番角逐。东帝汶独立后,它仍是澳、印尼这两个文明形态迥异的地区大国关注的对象。 | 2006 |  | 02 | 28-32 |
| 印度尼西亚社会转型与族群冲突——亚齐民族分离运动个案研究 | 庄礼伟 | 世界民族 | 中央政府;东帝汶;亚齐人;族群冲突;印度尼西亚;民族分离运动;社会转型;个案研究; | 在当今世界,一些少数族群为什么要冒很大的风险来寻求脱离它们所在的国家? 除了分离,那些少数族群与中央政府之间还有没有其他选择? 特别是印度尼西亚(以下简称印尼)这样一个在某种程度上是人为组合起来(基本上都是由于殖民统治和殖民兼并)的国家,应如何处理历史遗留问题和面向 | 2005 |  | 01 | 29-35 |
| 亚齐独立运动的历史背景及其前景展望 | 武文侠 | 国际论坛 | 亚齐;;亚独;;谈判;;军事紧急状态;;前景 | 亚齐独立运动 (也称“自由亚齐运动”)建立 2 6年来 ,造成当地社会秩序严重混乱 ,影响了整个印尼的稳定和发展 ,成为印尼政府的心头之患。亚独的成立和发展有其历史和现实的背景。为解决亚齐问题 ,印尼中央政府采取了包括政治、经济、军事和外交等手段在内的综合措施。印尼中央政府决不会放弃亚齐 ,而亚独又得不到国际社会和当地多数民众的支持 ,因此要实现亚齐独立只能是个梦想。目前摆在亚独面前的有两个选择 :或接受政府的条件 ,和平解决 ;或继续顽抗 ,最终被政府军彻底剿灭。但其结果相同 ,亚齐将以享有更大特权的自治区地位留在统一的印尼共和国内。 | 2004 |  | 04 | 56-60+81 |
| 多民族共存与民族歧视——当代东南亚族际关系的两个侧面 | 陈衍德 | 南洋问题研究 | 民族共存;;民族歧视;;族际关系 | 互为依存的经济生活使各民族共生共荣,历史文化的差异又使民族歧视普遍存在,当代东南亚族际关系的两面性和复杂性与政治、经济发展的不平衡相互交织,共同作用于战后本地区的历史进程,并使东南亚成为当今世界族际关系变幻莫测的地区之一。 | 2004 |  | 01 | 27-38+95-96 |
| 澳美关系与亚太地区安全 | 胡宁 | 当代亚太 | 澳大利亚;亚太国家;霍华德主义;防务合作;亚太地区; | 与美国结盟是澳大利亚对美关系的基础 ,也是其对外战略的支柱。澳美关系是不对称的主导与依附的关系。澳大利亚与美结盟的政策使不少亚太国家对其“融入亚洲”的政策表示怀疑。冷战结束以来 ,尤其是美国发生九一一事件之后 ,美澳联盟关系的进一步深化更令许多亚太国家对澳大利亚的亚洲政策不安有加 ,使澳大利亚和亚太国家之间难以建立真正的互信关系 | 2004 |  | 01 | 11-15 |
| 冷战后美国与印尼的安全合作 | 刘虎 | 当代亚太 | 冷战后;安全合作; | 美国与印尼由于安全上互不威胁且一方能为另一方的安全利益服务 ,从而能够以经济利益为纽带 ,淡化人权与意识形态冲突 ,建立起一种相对稳定的双边关系 | 2003 |  | 06 | 28-31 |
| 华人新移民在澳大利亚、新西兰的生存适应分析 | 高伟浓 | 华侨华人历史研究 | 华人移民;;澳大利亚;;新西兰;;生存适应 | 澳大利亚、新西兰自上世纪七八十年代开始实行面向亚洲的政策以来 ,来自亚太地区不同国家的华人移民以及其他亚裔移民大量移进这两个国家。他们在异国他乡面临着以高失业率为主要特征的生存危机。但这一包括中国大陆新移民的华人群体 ,克服重重困难 ,站稳脚跟 ,逐步积累 ,取得了初步的成功 | 2003 |  | 02 | 44-51 |
| 试论东帝汶民族的形成 | 鲁虎 | 世界民族 | 联合国;民族意识;独立运动;殖民统治;印尼语;东帝汶;部族主义;天主教会; | 东帝汶一直是东南亚研究中被忽略的地区。它偏居努沙登加拉群岛的帝汶岛东部 ,面积仅 1 8874平方公里 ,人口为 74万人。① 1 7世纪后 ,东帝汶逐渐沦为葡萄牙的殖民地 ,但不管是在东南亚还是在葡萄牙殖民帝国内部 ,它都是被遗忘的角落。 2 0世纪 70年代中期和 90年代末 ,东帝汶? | 2003 |  | 02 | 17-23 |
| 东帝汶天主教会的变迁及其影响 | 鲁虎 | 世界历史 | 东帝汶;;天主教会;;印尼;;东帝汶问题;;贝洛主教 | 在短短十几年里 ,东帝汶天主教徒迅速增多 ,由不到总人口的三分之一上升到占绝对多数。与此同时 ,原先作为葡萄牙殖民工具的天主教会不但实现了东帝汶化 ,而且在社会政治方面的影响日益增强 ,崛起为印尼在东帝汶统治的最大抵抗和反对力量。 70年代中期以来东帝汶社会内部的这一巨变 ,对后来东帝汶问题的走向产生了重大影响。对东帝汶天主教会的变迁进行考察 ,将有助于弥补东帝汶历史尤其是东帝汶问题的研究偏重暴力冲突和外部干预的不足。 | 2003 |  | 01 | 31-39+128 |
| “东盟方式”与东盟地区一体化 | 陈寒溪 | 当代亚太 | “东盟方式”;国家权力机构;不干涉原则;东盟一体化;一体化模式;东盟成员国;地区一体化; | 东盟自成立以来逐渐形成了一套独特的组织和决策方式 ,即“东盟方式”。“东盟方式”有利于东盟国家的政治合作 ,是东盟一体化初期阶段的重要基础。但是在“东盟方式”的制约下 ,东盟难以建立超国家权力机构 ,缺乏集体行动能力 ,因此不利于经济一体化的发展 ,也使东盟难以在经济和安全领域进行危机管理。认识到这一点 ,东盟正在尝试采取有限的改革措施。 | 2002 |  | 12 | 47-51 |
| 冷战后东南亚的民族分离主义运动——以印度尼西亚为例 | 李一平 | 当代亚太 | 民族分离主义;均衡性;东南亚地区;亚齐人;印度尼西亚; | 自 2 0世纪 90年代末以来 ,东南亚的民族分离主义运动不断发展 ,尤以印度尼西亚为典型。这种发展有着复杂的原因 ,其中最根本的还在于不同地区和不同民族之间在“中心”与“边缘”关系上存在着巨大的社会经济差异与不均衡性。因此 ,减少这种不均衡性 ,将有助于解决印尼乃至整个东南亚地区的民族分离主义问题。 | 2002 |  | 09 | 59-64 |
| 独立前夕东帝汶的政治与经济 | 韩林,王子昌 | 东南亚研究 | 东帝汶;;政治;;经济 | 东帝汶的革命还未结束 ,新的考验就已经出现 :外国投资不足、官员以权谋私、政治意见分歧等等。这些问题解决得如何将对东帝汶的未来有着重要影响。 | 2002 |  | 02 | 36-40 |
| 中国警察在东帝汶——记维和高官廉长刚 | 余音; | 中国国情国力 | 东帝汶;联合国;维和警察;副总警监; | <正> 在160万名中国警察中,他是拥有著名的美国密歇根大学刑事司法硕士学位的佼佼者;东帝汶是第一个完全由联合国接管、并扶持其完全独立的国家。在东帝汶维和警察部队中,仅一年时间,他就脱颖而出,由一名巡警成长为常务副总警监、代总监(相当于东帝汶临时政府公安部代部长);迄今为止,在中国向联合国东帝汶任务区和波黑任务区先后派出的4批74名维和民事警察中,他是首批参加,且维和 | 2002 |  | 01 | 48-51 |
| 印尼伊斯兰教与基督教冲突的根源 | 温北炎 | 东南亚研究 | 印尼;;伊斯兰教;;基督教;;冲突 | 冷战结束后 ,伊斯兰教复兴运动再次席卷穆斯林世界 ,伊斯兰势力在国际政治舞台上的作用 ,成为 2 0世纪末最重要的政治现象之一。伊斯兰复兴运动的东渐影响着东南亚局势的发展。印尼作为世界最大穆斯林国家 ,在世纪末遭受亚洲金融危机的重创 ,政治、经济和社会危机总爆发。民族宗教冲突是社会危机的突出表现之一 ,而伊斯兰教与基督教冲突又是宗教冲突的焦点。探讨印尼宗教冲突的根源 ,有助于了解印尼局势的发展 ;解决印尼宗教冲突 ,有利于东南亚地区的稳定 ,这是各国政府和学者共同关心的问题。 | 2001 |  | 02 | 14-18 |
| 论东南亚少数民族人权问题 | 雷春斌 | 东南亚研究 | 东南亚;;少数民族;;人权 | 东南亚少数民族问题 ,局限在当事国家境内 ,属国内法范畴 ,跟国际法无关。但是 80年代以来 ,东南亚少数民族问题却成了西方人权外交所攻击的一个热点内容 ,并对东南亚有关国家与西方大国关系产生一定的负面影响。 | 2001 |  | 02 | 30-33 |
| 东盟不干涉内政原则:过去和未来 | 王小民,刘长安 | 东南亚研究 | 主权;;东盟;;不干涉内政;;演变 | 东盟成立以来 ,不干涉内政原则一直是东盟的基本准则。但随着全球化影响力的进一步扩大 ,东南亚金融危机的爆发 ,印尼森林大火的发生等 ,这项原则受到了重大挑战 ,东盟内部要求对它进行改革的呼声不断 ,西方大国也在这个问题上对东盟施加压力。最终 ,东盟决定仍维持不干涉内政原则 ,但在一些影响力超出国界的问题上 ,采取“增进相互影响”的方针 ,以维护和促进东盟的共同利益 | 2001 |  | 01 | 53-58 |
| 从亚齐分离运动看印尼的民族分离主义问题 | 张洁 | 当代亚太 | 殖民者;民族分离主义;分离运动; | 亚齐分离主义运动具有代表性 ,从它的形成和发展过程可以看出印尼分离主义运动产生的历史、文化、政治、经济等因素。在不同的阶段 ,印尼分离运动的原因有所不同。在 5 0年代 ,政治权利的争夺和宗教文化的因素更多些。在 70年代之后 ,主要是经济因素和政治因素。解决民族分离运动的重要途径之一是实行区域自治。随着历史的发展 ,印尼民族分离运动最终会走上民族聚合的道路。 | 2000 |  | 07 | 45-52 |
| 澳大利亚与未来亚洲——在中国社科院澳新中心的演说(摘要) | 彼得·纽金,刘樊德 | 当代亚太 | 澳大利亚联邦;经济危机;社科院; | 20 0 0年 5月 16日 ,应中国社会科学院亚洲太平洋研究所之邀 ,澳大利亚国会众议院议员、国会澳中关系委员会主席彼得·纽金 ( PeterNugent)在中国社科院澳大利亚新西兰南太平洋研究中心发表演说 ,阐述了对澳中关系、东亚金融危机、东帝汶事件、澳大利亚国内经济改革等问题的看法。现将讲话的摘要整理成文 ,发表于后。 | 2000 |  | 06 | 42-47 |
| 印尼瓦希德政府:挑战与机遇并存 | 唐慧 | 东南亚研究 | 印尼;;瓦希德;;政治转型 | 印尼瓦希德政府的诞生标志着印尼政治进入新纪元、印尼社会开始逐步走上民主改革的道路。本文对瓦希德政府所面临的挑战和机遇作了分析 :印尼人民前进的方向是光明的、充满希望的 | 2000 |  | 03 | 10-14 |
| 美国学者论新干涉主义和第三世界 | 范军 | 国外理论动态 | 联合国宪章;国家主权;民族自决权;新干涉主义;东帝汶;人道主义灾难;第三世界;人道主义干涉; | 美国普林斯顿大学理查德·福尔克在美刊《现代史》１９９９年１１月号上发表了《新干涉主义和第三世界》一文,主要论述西方以民族自决权为核心的新干涉主义和坚持以主权完整为核心的第三世界二者之间的关系。文章主要内容如下。联合国、美国和人道主义干涉目前要求针对人道主义 | 2000 |  | 05 | 15-17 |
| 东帝汶走向独立 | 刘新生 | 国际问题研究 | 联合国;国际社会;殖民统治;安理会;印尼军队;东帝汶; | 东帝汶位于东南努沙登加拉群岛最东端 ,包括帝汶岛东半部 (西部属于印尼 ) ,西部飞地欧库西和阿陶罗岛。面积 14 874平方公里 ,人口 84万 ,主要是巴布亚人和马来人后裔 ,华人约 1万人。通用德顿语 ,另有多种地方语言 ,官方及上层社会普遍用葡萄牙语 ,居民中约 93 %信奉罗马天主 | 2000 |  | 03 | 56-58 |
| 走向独立的东帝汶 | 刘新生 | 当代亚太 | 东帝汶;全民公决;印尼军队;联合国; | 1999年 8月 ,东帝汶在联合国的主持下进行全民投票 ,78.5 %的东帝汶人选择了独立。在东帝汶独立前 ,由联合国东帝汶过渡行政当局全权管理。虽然目前东帝汶局势基本稳定 ,但如何克服复仇心理 ,实现民族和解 ,对脆弱的东帝汶来说极为重要 ,未来的独立进程可谓任重道远。 | 2000 |  | 04 | 36-39 |
| 东帝汶主要政治人物 | 晓雅 | 当代亚太 | 东帝汶;全国抵抗委员会;政治人物; | 萨纳纳 .古斯芒 (Kay Rala XananaGusmao)1 946年 6月 2 0日出生于东帝汶的马纳图托(Manatuto) ,小学毕业后进入天主教教会中学。古斯芒年轻时就开始自己谋生 ,白天做测绘员 ,晚上在中文学校教书。1 974年加入东帝汶独立革命阵线 (简称革阵 ) ,从事反对葡萄牙殖民统治的斗争 ,1 | 2000 |  | 04 | 39-40 |
| 东帝汶事件后印(尼)澳关系走向及其影响 | 桂久强 | 东南亚研究 | 政治动荡;;东帝汶;;对外政策走向;;霍华德主义;;对策 | 在印尼发生地区政治动荡后 ,澳大利亚奉行新的外交政策即“霍华德主义” ,积极地介入该地区的安全事务 ,一度成为美国在此地区的政策代言人 ,并由此引起印尼的不满 ,在印尼新总统瓦希德上台执政后 ,印尼政府调整了对外政策 ,主动发展同包括中国在内的亚洲各国的友好关系 ,为我国在此地区发挥积极影响提供了历史契机。 | 2000 |  | 02 | 14-16+20 |
| 瓦希德上台后的印尼内外政策趋向 | 洪耀星 | 东南亚研究 | 瓦希德;;印尼;;内外政策;;趋向 | 本文分析了阿卜杜拉·拉赫曼·瓦希德上台后的印尼内外政策趋向 ,指出新政府将面临改革军队 ,巩固领土完整等诸多挑战。 | 2000 |  | 02 | 35-40 |
| 东帝汶问题的由来与演变 | 鲁虎 | 世界历史 | 东帝汶;非殖民化; | 东帝汶位于印尼群岛的帝汶岛东部 ,加上该岛西部北海岸的欧库西飞地以及附近的阿陶罗岛、杰科岛等 ,面积 18,899平方公里。它南临印度洋的安汶海 ,北濒太平洋的班达海和韦达海峡 ,东隔海与马鲁古群岛相望 ,西连印尼东努沙登加拉省的西帝汶。境内多山 ,人口不多 ,经济落后。16世 | 2000 |  | 02 | 96-101 |
| 印尼地区性动乱原因分析 | 徐绍丽 | 当代亚太 | 瓦希德政府;分离主义;亚齐人;伊里安查亚;地区性; | 1999年 1 0月 ,瓦希德在印尼总统选举中获胜。瓦希德政府从苏哈托政权继承下来的是一大堆问题 ,即分离主义、贪污腐败、朋党勾结、裙带风以及经济崩溃。治理国家和发展经济要有一个安定的国内环境。然而自瓦希德执政以来 ,尤其是今年年初以来 ,印尼局部地区却接连不断发生动乱 | 2000 |  | 03 | 30-34 |
| 亚齐问题的由来、发展和前景 | 晓雅 | 当代亚太 | 瓦希德; | 1999年 1 1月 8日 ,亚齐特区举行了百万群众大集会 ,要求就自治还是独立进行公民投票 ,亚齐问题一时演变成印尼国内最突出的问题 ,同时成为国际社会关注的一个焦点。旧恨新怨亚齐特区位于苏门答腊岛北部马六甲海峡出口处 ,战略和贸易地位都很重要。这个地区的面积约 5 .5万平方 | 2000 |  | 03 | 38-41 |
| 东帝汶华人社会初探 | 鲁虎 | 华侨华人历史研究 | 华人社会;东帝汶; | 有关东帝汶华人社会的历史和现状,至今鲜见专门和系统的论述。这是与东帝汶本身长期受忽略的特点分不开的。东帝汶处在印尼群岛的外缘,面积仅18899平方公里,地偏人稀。17世纪后逐渐沦为葡萄牙的殖民地,但葡萄牙帝国的中心是在非洲。即使在亚洲,东帝汶的重要性也远不能与澳... | 2000 |  | 01 | 6 |
| 改善和发展中国与印度尼西亚的关系 | 孙小迎 | 当代亚太 | 印尼华人;瓦希德;东帝汶;印度尼西亚;对华政策;梅加瓦蒂; | １９９９年１０月，瓦希德和梅加瓦蒂在印度尼西亚大选中分别当选总统和副总统。他们对改善和发展印尼与中国的关系表现出真诚和很高的热情。１９９９年１２月１日至３日，瓦希德总统对中国进行了国事访问。江泽民主席同瓦希德总统就双边关系以及一些共同关心的重大地区和国际? | 2000 |  | 02 | 30-34 |
| 东帝汶独立的由来及其前景 | 方金英 | 现代国际关系 | 东帝汶;临时权力机构;全民公决;澳大利亚;印尼军队; | 今年１月２７日印尼哈比比政府宣布，东帝汶“广泛自治”方案如不能被东帝汶人接受，印尼准备让其独立。８月３０日东帝汶在联合国主持下，进行全民公决，结果７８．５％的投票者支持东帝汶独立。１０月２０日，印尼“人民协商会议”通过法令，承认公决结果，并将在年底前把东? | 1999 |  | 12 | 44-46 |
| 印尼国会选举后的政局走向 | 方金英 | 现代国际关系 | 国会选举;梅加瓦蒂;建设团结党;人民协商会议;政局走向;穆斯林国家;民族觉醒; | 今年６月７日，印尼举行亚洲金融风暴后的首次国会选举，４８个符合参选条件的政党派出候选人角逐４６２个直选产生的国会议席。据截至７月３日的选票统计，新组建的民主斗争党得票率一直领先，执政的专业集团党居第二位，其后依次排列为民族觉醒党、建设团结党、民族使命... | 1999 |  | 07 | 4 |
| 中美贸易摩擦对亚洲人民币区域化进程的影响研究 | 苏丹华;崔笑宁;鲍勤;汪寿阳; | 管理评论 | 人民币区域化;;中美贸易摩擦;;货币影响力指数;;汇率;;事件分析法 | 人民币在亚洲的实质性区域化进程是推进人民币国际化的重要内容,中美贸易摩擦这一事件加快了全球产业分工和国际贸易格局的转变,随着我国部分产业向亚洲其他国家转移,我国与亚洲国家的经贸往来加强,这或将影响人民币在亚洲的区域化进程。本文基于改进的Frankel-Wei回归模型,使用48个月滚动窗口的估计结果构建货币影响力指数和人民币相对影响指标,研究了亚洲总体货币区域化进程和亚洲国家人民币区域化进程,并结合事件分析法研究中美贸易摩擦对亚洲人民币区域化的影响。结果显示:亚洲影响力较大的储备货币为美元和人民币,美元仍保持亚洲主导地位;人民币区域化国家主要分布在东南亚、东亚和中亚地区;总体来看,中美贸易摩擦对推进亚洲人民币区域化进程产生积极影响,而贸易摩擦的进一步升级未对其产生显著的负面效应。中美贸易摩擦促进印度尼西亚、不丹和印度等国形成人民币区域化,有利于提升人民币对也门、尼泊尔和阿富汗等国本币价格的影响力,但贸易摩擦的进一步升级导致吉尔吉斯斯坦和土耳其等国加速偏离人民币区域化,减弱人民币对其本币价格的影响力。 |  |  |  | 15 |
| 联合国维和行动成功的条件——以东帝汶维和行动为个案 | 何银; | 外交评论(外交学院学报) | 维和行动;;建设和平;;发展和平;;联合国;;包容性和平规范;;东帝汶 | 管理冲突和建设和平是联合国多层维和行动的两项基本功能，也就是在维持和平的同时，消除冲突根源、建立持久和平。评估维和行动成功与否，主要看维和结束后东道国是否保有稳定的局面以及和平的前景。本文在此基础上提出一个理论假设：维和行动的成功有赖于三个条件，即联合国尽责、国际社会广泛支持以及具备包容性的建设和平规范。其中，前两者是基础性条件，后者是核心条件。长期以来，建设和平被产生于西方文明实践经验的自由和平所主导，其结果往往建设的是“虚幻的和平”。产生于泛东亚地区中华文明圈实践经验的发展和平可以弥补自由和平的诸多不足。东帝汶维和行动的成功案例表明，建设持久和平需要借鉴基于各种文明实践经验的和平规范，充分利用东道国的地方性知识，需要联合国、国际社会和东道国等各方行动者的共同努力。 | 2022 | 39 | 03 | 131-154+8 |
| 中国-丝路国家基础设施连通性评估方法与格局 | 王成金;陈沛然;王姣娥;李娜; | 地理研究 | 中国;;沿线国家;;基础设施;;互联互通;;空间格局 | 基础设施互联互通是不同区域之间空间网络形成的支撑,对区际生产要素流动、市场融合和资源配置具有重要作用,也是"一带一路"建设的重点内容和前提条件。立足于综合基础设施网络,以"一带一路"沿线国家/地区为分析地域,设计数理模型,评价了中国与沿线国家的基础设施网络连通性,考察其基本特征与空间格局,然后分别从铁路、公路、航运、通讯、能源等各种基础设施方式的视角,分析了不同基础设施网络的互联互通水平,探讨了基础设施连通的类型分异及其主导因素,凝练基础设施连通的空间模式。主要结论如下:①从海陆属性来看,岛屿型国家与中国设施连通性最高,其次为综合型国家,内陆型国家最低。对国际区域而言,俄蒙和东南亚地区与中国的设施连通性最高,中东欧地区连通性最低。从国家尺度来看,俄罗斯和越南是与中国设施连通水平最高的国家,巴勒斯坦、东帝汶等5个国家与中国尚未形成设施连通性。从连通方式的构成来看,航运网络的连通性最高,其次为航空和光缆。②空间距离、连通方式和重大交通走廊共同主导了设施连通性的类型分异。③"一带一路"沿线国家/地区与中国的设施连通形成了四种典型模式,包括海陆融合型外缘连通模式、陆路通道直接连通模式、陆心内生性低水平连通模式、远距离不均衡连通模式。 | 2020 | 39 | 12 | 2685-2704 |
| “一带一路”沿线东南亚国家的政党轮替风险及中国应对 | 弓联兵;王晓青; | 当代世界与社会主义 | “一带一路”;;东南亚;;政党轮替风险;;风险规避 | 东南亚是"一带一路"倡议实施的重心所在,中国与沿线东南亚国家的交流与合作已取得显著成效。但与此同时,东南亚国家存在着政治、经济和社会各类风险,其中,因政党轮替引发的政治风险是一项普遍的风险类型。东南亚国家普遍存在的政党轮替风险,以及由此衍生的政策不连续、政治暴力、政府合同违约、没收、征用等次生风险,严重影响着"一带一路"倡议在东南亚地区的顺利实施。对此,有必要对东南亚国家的政党轮替风险进行科学与全面的评估和分析,在此基础上,中国应当在"一带一路"倡议的原则和框架下,通过拓展与沿线国家的双多边关系与合作,充分发挥政党外交的优势作用,善于运用法律仲裁手段等途径全面应对政党轮替风险及其次生风险,从而保障"一带一路"倡议在东南亚地区行稳致远。 | 2018 |  | 05 | 150-157 |
